# Supplementary material
Source: Research Square preprint supplement (doi:10.21203/rs.3.rs-10227404/v1)

# Supplementary Figure and Table

## S1. Spatiotemporal Evolution of Primary School Teacher Allocation in China

**Table S1** Raw Data of Student-Teacher Ratio (STR) and Class-Teacher Ratio (CTR) by Province in China (2004, 2010, 2016, 2023), stratified by total, urban, town, and rural area

| **Region** | | **2004**  **STR** | **2010**  **STR** | **2016**  **STR** | **2023**  **STR** | **2004**  **CTR** | **2010**  **CTR** | **2016**  **CTR** | **2023**  **CTR** |
| --- | --- | --- | --- | --- | --- | --- | --- | --- | --- |
| **Beijing** | Total | 10.5818 | 13.2024 | 14.0496 | 0.4343 | 0.4198 | 0.4180 | 0.4115 | 14.7289 |
| Urban | 11.5281 | 14.0918 | 14.6058 | 0.4388 | 0.4310 | 0.4226 | 0.4116 | 15.1608 |
| Towns | 10.9016 | 12.2760 | 13.1009 | 0.4185 | 0.3916 | 0.3990 | 0.4099 | 12.5498 |
| Rural | 8.2552 | 10.2827 | 10.4989 | 0.4482 | 0.3929 | 0.4003 | 0.4123 | 11.7073 |
| **Tianjin** | Total | 13.1723 | 13.5567 | 15.1923 | 0.3916 | 0.3938 | 0.4202 | 0.4077 | 15.8956 |
| Urban | 12.2120 | 12.3547 | 14.8394 | 0.3338 | 0.3635 | 0.3959 | 0.4074 | 16.8142 |
| Towns | 13.2983 | 15.2377 | 17.3947 | 0.4122 | 0.3991 | 0.4731 | 0.4176 | 14.5255 |
| Rural | 14.6325 | 12.9941 | 14.9389 | 0.4599 | 0.4370 | 0.4783 | 0.4016 | 11.0752 |
| **Hebei** | Total | 16.8396 | 16.0355 | 17.6589 | 0.5416 | 0.4478 | 0.4526 | 0.4295 | 16.0999 |
| Urban | 17.8056 | 18.9664 | 19.0966 | 0.3800 | 0.3694 | 0.3839 | 0.4056 | 18.6268 |
| Towns | 17.3486 | 17.9580 | 18.8180 | 0.4446 | 0.3769 | 0.4259 | 0.4049 | 16.4514 |
| Rural | 16.5147 | 14.8656 | 15.9865 | 0.5992 | 0.4866 | 0.5082 | 0.4853 | 13.1753 |
| **Shanxi** | Total | 18.7914 | 15.2757 | 13.2387 | 0.6527 | 0.4563 | 0.4248 | 0.4035 | 13.9576 |
| Urban | 19.5546 | 18.8232 | 17.5651 | 0.4120 | 0.3564 | 0.3932 | 0.4189 | 17.4150 |
| Towns | 20.6439 | 18.3229 | 14.7863 | 0.4165 | 0.3712 | 0.3814 | 0.3740 | 13.6036 |
| Rural | 18.2559 | 13.1196 | 8.2161 | 0.7575 | 0.5167 | 0.4963 | 0.4336 | 7.1712 |
| **Inner Mongolia** | Total | 13.3379 | 12.5986 | 13.4678 | 0.4847 | 0.3386 | 0.3705 | 0.3331 | 12.5691 |
| Urban | 18.3213 | 18.0681 | 16.9934 | 0.3949 | 0.3706 | 0.3983 | 0.3609 | 16.0950 |
| Towns | 15.6800 | 13.8707 | 13.2698 | 0.3803 | 0.3191 | 0.3539 | 0.3162 | 11.7729 |
| Rural | 10.8222 | 8.3840 | 8.5578 | 0.5527 | 0.3380 | 0.3678 | 0.3201 | 6.8461 |
| **Liaoning** | Total | 16.7122 | 14.8550 | 14.1644 | 0.5249 | 0.4326 | 0.3964 | 0.3824 | 14.2875 |
| Urban | 18.3652 | 17.1361 | 16.6702 | 0.4249 | 0.4031 | 0.3931 | 0.4233 | 17.8819 |
| Towns | 17.5794 | 16.7850 | 13.0474 | 0.3838 | 0.3540 | 0.3417 | 0.3113 | 10.3728 |
| Rural | 15.7756 | 13.2629 | 10.5685 | 0.5984 | 0.4609 | 0.4705 | 0.3573 | 7.6556 |
| **Jilin** | Total | 12.3586 | 11.6033 | 11.5295 | 0.4692 | 0.4093 | 0.3757 | 0.3574 | 11.1477 |
| Urban | 16.5565 | 15.2411 | 14.7225 | 0.3802 | 0.3381 | 0.3586 | 0.3716 | 14.6644 |
| Towns | 14.9313 | 15.2593 | 12.6539 | 0.3826 | 0.3503 | 0.3417 | 0.3358 | 11.3645 |
| Rural | 10.2822 | 8.6086 | 7.5760 | 0.5255 | 0.4612 | 0.4228 | 0.3668 | 4.7035 |
| **Heilongjiang** | Total | 13.2110 | 12.4194 | 12.0539 | 0.4758 | 0.3929 | 0.3553 | 0.3372 | 11.1553 |
| Urban | 16.0833 | 14.9778 | 15.2692 | 0.3668 | 0.3447 | 0.3643 | 0.3756 | 14.4502 |
| Towns | 15.9540 | 16.4157 | 12.8411 | 0.3579 | 0.3443 | 0.3396 | 0.3050 | 9.5660 |
| Rural | 11.6892 | 10.0026 | 6.9788 | 0.5372 | 0.4277 | 0.3661 | 0.3050 | 4.7949 |
| **Shanghai** | Total | 14.2452 | 15.5083 | 14.7918 | 0.4012 | 0.4181 | 0.3968 | 0.3718 | 13.9943 |
| Urban | 14.2023 | 13.2276 | 14.9870 | 0.4324 | 0.4139 | 0.4016 | 0.3727 | 14.0622 |
| Towns | 14.4532 | 17.1078 | 13.9281 | 0.3680 | 0.4191 | 0.3713 | 0.3649 | 13.5245 |
| Rural | 12.2330 | 22.8168 | 14.3928 | 0.3652 | 0.4889 | 0.4014 | 0.3622 | 12.8189 |
| **Jiangsu** | Total | 19.9372 | 15.9777 | 18.0566 | 0.4624 | 0.3706 | 0.4298 | 0.3890 | 16.1635 |
| Urban | 18.4964 | 16.7509 | 17.8775 | 0.4261 | 0.3884 | 0.4059 | 0.3866 | 16.5067 |
| Towns | 19.7846 | 16.7563 | 18.2252 | 0.4036 | 0.3535 | 0.4282 | 0.3889 | 16.0348 |
| Rural | 20.4711 | 14.8047 | 18.0946 | 0.4909 | 0.3747 | 0.5155 | 0.4142 | 13.4828 |
| **Zhejiang** | Total | 21.5091 | 19.3899 | 17.7494 | 0.5226 | 0.4572 | 0.4604 | 0.4344 | 17.2519 |
| Urban | 21.6378 | 20.0600 | 18.1426 | 0.4838 | 0.4551 | 0.4532 | 0.4346 | 17.7968 |
| Towns | 21.5313 | 19.4762 | 18.0746 | 0.4873 | 0.4381 | 0.4586 | 0.4304 | 16.8870 |
| Rural | 21.3596 | 18.4425 | 15.8027 | 0.6094 | 0.4926 | 0.4862 | 0.4468 | 14.8101 |
| **Anhui** | Total | 23.7579 | 18.7377 | 17.8951 | 0.6113 | 0.4996 | 0.5142 | 0.4760 | 17.6045 |
| Urban | 20.1533 | 19.7304 | 20.0717 | 0.4127 | 0.3934 | 0.4399 | 0.4514 | 19.7815 |
| Towns | 22.6596 | 20.8144 | 19.6230 | 0.4533 | 0.4000 | 0.4803 | 0.4699 | 18.6764 |
| Rural | 24.6461 | 17.8427 | 15.3220 | 0.6780 | 0.5556 | 0.5785 | 0.5192 | 12.8006 |
| **Fujian** | Total | 16.7841 | 15.2548 | 18.0017 | 0.5435 | 0.4329 | 0.4557 | 0.4312 | 17.6925 |
| Urban | 19.6524 | 20.5352 | 21.0087 | 0.4423 | 0.4317 | 0.4373 | 0.4083 | 18.9163 |
| Towns | 17.4328 | 15.6512 | 18.3625 | 0.4126 | 0.3760 | 0.4175 | 0.4229 | 18.2119 |
| Rural | 15.7868 | 11.5263 | 13.7950 | 0.6210 | 0.4852 | 0.5305 | 0.5068 | 13.4927 |
| **Jiangxi** | Total | 19.8692 | 20.9969 | 19.2900 | 0.5449 | 0.5475 | 0.5239 | 0.4647 | 15.7033 |
| Urban | 21.1819 | 21.9551 | 21.4636 | 0.4122 | 0.4141 | 0.4271 | 0.4323 | 18.2120 |
| Towns | 20.0784 | 23.5120 | 21.6161 | 0.5009 | 0.4332 | 0.4565 | 0.4321 | 16.5537 |
| Rural | 19.5610 | 20.1325 | 15.6541 | 0.5883 | 0.5968 | 0.6473 | 0.5771 | 10.3207 |
| **Shandong** | Total | 16.5737 | 16.2406 | 16.9085 | 0.4438 | 0.3963 | 0.3966 | 0.4145 | 17.0105 |
| Urban | 17.6656 | 18.9368 | 18.2528 | 0.3865 | 0.3871 | 0.3823 | 0.4131 | 18.2459 |
| Towns | 16.4676 | 16.5383 | 17.0322 | 0.3731 | 0.3517 | 0.3761 | 0.4026 | 17.0679 |
| Rural | 16.2468 | 15.3640 | 15.3641 | 0.4849 | 0.4170 | 0.4365 | 0.4430 | 13.7298 |
| **Henan** | Total | 21.1926 | 21.8292 | 19.0779 | 0.5476 | 0.5118 | 0.5100 | 0.4463 | 16.0210 |
| Urban | 18.9197 | 21.9617 | 21.2796 | 0.3857 | 0.3821 | 0.4145 | 0.4109 | 19.0453 |
| Towns | 20.9792 | 23.3882 | 20.8280 | 0.3943 | 0.4147 | 0.4704 | 0.4266 | 17.1565 |
| Rural | 21.5526 | 21.4331 | 16.7889 | 0.5957 | 0.5566 | 0.5809 | 0.5011 | 12.0454 |
| **Hubei** | Total | 21.4170 | 18.6432 | 17.1341 | 0.5356 | 0.4262 | 0.4356 | 0.4173 | 17.3649 |
| Urban | 18.8677 | 18.8390 | 19.3320 | 0.4458 | 0.3911 | 0.4149 | 0.4063 | 18.9377 |
| Towns | 19.8760 | 20.5143 | 17.8503 | 0.3485 | 0.3680 | 0.4150 | 0.4134 | 17.5728 |
| Rural | 22.8162 | 17.7738 | 13.7933 | 0.6108 | 0.4631 | 0.4841 | 0.4567 | 12.4279 |
| **Hunan** | Total | 17.4175 | 19.1634 | 19.7783 | 0.5036 | 0.4442 | 0.4715 | 0.4304 | 16.7064 |
| Urban | 19.0075 | 22.0427 | 21.0371 | 0.3678 | 0.3905 | 0.4033 | 0.4025 | 18.7750 |
| Towns | 17.7098 | 19.7176 | 21.6893 | 0.3804 | 0.3642 | 0.4267 | 0.4135 | 17.3474 |
| Rural | 17.0049 | 18.2577 | 16.6552 | 0.5716 | 0.5026 | 0.5700 | 0.5210 | 11.4514 |
| **Guangdong** | Total | 26.4731 | 19.7000 | 18.6038 | 0.6286 | 0.4898 | 0.4727 | 0.4645 | 18.1041 |
| Urban | 26.6085 | 21.0835 | 20.1178 | 0.5384 | 0.4463 | 0.4454 | 0.4337 | 18.7203 |
| Towns | 23.9362 | 19.8187 | 18.5344 | 0.4787 | 0.4119 | 0.4638 | 0.4748 | 18.7500 |
| Rural | 27.3651 | 18.7591 | 15.1442 | 0.7283 | 0.5740 | 0.5464 | 0.5650 | 14.8286 |
| **Guangxi** | Total | 23.4639 | 19.5319 | 19.4098 | 0.7825 | 0.5867 | 0.5352 | 0.4532 | 17.1274 |
| Urban | 18.9519 | 22.2153 | 20.9305 | 0.4613 | 0.4490 | 0.4150 | 0.3949 | 19.1362 |
| Towns | 18.3199 | 19.2232 | 20.5649 | 0.4383 | 0.4058 | 0.4526 | 0.4074 | 18.0579 |
| Rural | 25.8184 | 19.3158 | 17.9614 | 0.9432 | 0.6779 | 0.6435 | 0.5504 | 14.4466 |
| **Hainan** | Total | 19.9935 | 14.9941 | 16.1752 | 0.5909 | 0.4461 | 0.4332 | 0.3930 | 14.9740 |
| Urban | 22.1062 | 22.6069 | 22.4287 | 0.5100 | 0.4344 | 0.4384 | 0.3790 | 17.4333 |
| Towns | 19.7211 | 17.7511 | 16.4790 | 0.4112 | 0.3571 | 0.3745 | 0.3820 | 15.5141 |
| Rural | 19.6767 | 11.9685 | 10.3537 | 0.6773 | 0.4967 | 0.5058 | 0.4273 | 10.7399 |
| **Chongqing** | Total | 23.8494 | 17.2278 | 17.0493 | 0.5900 | 0.4331 | 0.4239 | 0.3894 | 15.3074 |
| Urban | 18.4642 | 17.9572 | 18.6966 | 0.3990 | 0.3972 | 0.4092 | 0.3977 | 17.7864 |
| Towns | 24.5117 | 19.1469 | 18.1193 | 0.4237 | 0.3940 | 0.4015 | 0.3618 | 14.4377 |
| Rural | 24.7929 | 15.2719 | 13.0273 | 0.6438 | 0.4784 | 0.4814 | 0.4213 | 8.7836 |
| **Sichuan** | Total | 23.9194 | 19.3663 | 17.4781 | 0.6157 | 0.4635 | 0.4324 | 0.3820 | 15.5976 |
| Urban | 22.5600 | 20.7574 | 19.3795 | 0.4436 | 0.4016 | 0.4036 | 0.3933 | 17.8847 |
| Towns | 22.9403 | 19.2061 | 18.4797 | 0.4219 | 0.3647 | 0.3897 | 0.3573 | 15.0658 |
| Rural | 24.3658 | 19.1255 | 14.9570 | 0.6905 | 0.5583 | 0.5071 | 0.4217 | 11.7836 |
| **Guizhou** | Total | 26.5170 | 21.9034 | 17.9315 | 0.6993 | 0.5696 | 0.4792 | 0.4442 | 18.1343 |
| Urban | 22.0346 | 24.6165 | 20.3460 | 0.4467 | 0.4472 | 0.4263 | 0.4188 | 20.0207 |
| Towns | 22.0113 | 21.7678 | 19.6317 | 0.4695 | 0.4117 | 0.4239 | 0.4165 | 19.0750 |
| Rural | 28.3352 | 21.6383 | 15.7400 | 0.7949 | 0.6373 | 0.5417 | 0.5150 | 14.6774 |
| **Yunnan** | Total | 20.1238 | 18.3217 | 16.5876 | 0.6852 | 0.5280 | 0.4704 | 0.4614 | 16.6494 |
| Urban | 21.1404 | 23.4272 | 20.1269 | 0.4429 | 0.4315 | 0.4082 | 0.4096 | 19.1306 |
| Towns | 18.0574 | 17.9098 | 16.7797 | 0.4443 | 0.3861 | 0.3904 | 0.4218 | 17.5798 |
| Rural | 20.4224 | 18.0401 | 15.6321 | 0.7455 | 0.5768 | 0.5228 | 0.5150 | 14.7446 |
| **Tibet** | Total | 24.0229 | 15.8409 | 14.3660 | 0.8647 | 0.4753 | 0.4030 | 0.3738 | 14.4014 |
| Urban | 15.3605 | 15.7326 | 15.5475 | 0.3395 | 0.3231 | 0.3180 | 0.3274 | 15.9094 |
| Towns | 18.1904 | 14.2991 | 13.9088 | 0.5134 | 0.3385 | 0.3484 | 0.3485 | 14.1833 |
| Rural | 28.0064 | 16.4992 | 14.3441 | 1.1053 | 0.5540 | 0.4537 | 0.4040 | 13.9577 |
| **Shaanxi** | Total | 19.7262 | 14.9006 | 15.4751 | 0.6690 | 0.4334 | 0.4201 | 0.4133 | 15.9018 |
| Urban | 21.2014 | 21.1178 | 19.3333 | 0.4378 | 0.4091 | 0.3904 | 0.4028 | 18.4063 |
| Towns | 20.3643 | 18.6555 | 15.7517 | 0.4210 | 0.3432 | 0.3907 | 0.3980 | 15.1175 |
| Rural | 19.4118 | 12.8933 | 10.4372 | 0.7378 | 0.4570 | 0.5127 | 0.5009 | 9.4208 |
| **Gansu** | Total | 24.5138 | 16.8855 | 12.9090 | 0.7647 | 0.5823 | 0.5005 | 0.4435 | 13.4141 |
| Urban | 20.4120 | 20.6914 | 17.9967 | 0.4101 | 0.3789 | 0.3651 | 0.3830 | 18.0972 |
| Towns | 23.4137 | 17.6462 | 14.8751 | 0.5852 | 0.3962 | 0.3762 | 0.3839 | 14.7148 |
| Rural | 25.4516 | 16.0602 | 10.1182 | 0.8681 | 0.6718 | 0.6173 | 0.5693 | 8.2738 |
| **Qinghai** | Total | 18.4171 | 19.5227 | 17.3392 | 0.6383 | 0.5428 | 0.4687 | 0.4277 | 17.3691 |
| Urban | 21.7515 | 22.0487 | 19.0533 | 0.3958 | 0.4046 | 0.3577 | 0.3699 | 18.0533 |
| Towns | 17.8593 | 20.3827 | 18.2657 | 0.4958 | 0.4208 | 0.4131 | 0.4139 | 18.4351 |
| Rural | 17.9002 | 18.4183 | 15.3960 | 0.7580 | 0.6417 | 0.5902 | 0.4985 | 15.4610 |
| **Ningxia** | Total | 19.9905 | 19.6817 | 17.0853 | 0.5897 | 0.5132 | 0.4524 | 0.4359 | 17.3192 |
| Urban | 20.4255 | 21.1085 | 20.2807 | 0.3924 | 0.3781 | 0.3847 | 0.4195 | 20.2182 |
| Towns | 19.4031 | 20.5010 | 17.9016 | 0.4614 | 0.3840 | 0.3898 | 0.4028 | 17.5177 |
| Rural | 20.0904 | 18.7531 | 14.1196 | 0.6920 | 0.6245 | 0.5518 | 0.5072 | 12.4695 |
| **Xinjiang** | Total | 16.4408 | 14.4502 | 14.7507 | 0.5156 | 0.4197 | 0.4114 | 0.4278 | 17.7004 |
| Urban | 18.0811 | 18.4457 | 18.1412 | 0.3975 | 0.3874 | 0.3972 | 0.4174 | 19.6306 |
| Towns | 15.6538 | 15.9041 | 14.4559 | 0.3795 | 0.3708 | 0.3778 | 0.4044 | 16.7345 |
| Rural | 16.1782 | 13.1084 | 13.5812 | 0.5669 | 0.4386 | 0.4359 | 0.4487 | 17.2750 |

**Table S2.** The proportion of bachelor-and-above teachers (PBAT) and the proportion of mid-to-senior title teachers (PMSTT) by Province in China (2004, 2010, 2016, 2023), stratified by total, urban, town, and rural area.

| **Region** | | **2004% PBAT** | **2010% PBAT** | **2016% PBAT** | **2023% PBAT** | **2004% PMSTT** | **2010% PMSTT** | **2016% PMSTT** | **2023% PMSTT** |
| --- | --- | --- | --- | --- | --- | --- | --- | --- | --- |
| **Beijing** | Total | 0.2216 | 0.7524 | 0.9051 | 0.9662 | 0.4799 | 0.5636 | 0.5106 | 0.5248 |
| Urban | 0.2760 | 0.7865 | 0.9139 | 0.9678 | 0.5556 | 0.5697 | 0.5183 | 0.5196 |
| Towns | 0.1891 | 0.6945 | 0.8758 | 0.9575 | 0.4277 | 0.5471 | 0.4599 | 0.5489 |
| Rural | 0.1615 | 0.6542 | 0.8631 | 0.9557 | 0.4058 | 0.5496 | 0.4985 | 0.5634 |
| **Tianjin** | Total | 0.0608 | 0.4970 | 0.7650 | 0.9076 | 0.5798 | 0.8054 | 0.7030 | 0.6585 |
| Urban | 0.1115 | 0.5258 | 0.7937 | 0.9146 | 0.6558 | 0.8054 | 0.6802 | 0.6424 |
| Towns | 0.0279 | 0.5188 | 0.7159 | 0.8889 | 0.5251 | 0.7939 | 0.7672 | 0.7096 |
| Rural | 0.0237 | 0.4144 | 0.6860 | 0.8773 | 0.5327 | 0.8233 | 0.7461 | 0.7209 |
| **Hebei** | Total | 0.0476 | 0.2382 | 0.4789 | 0.7263 | 0.3755 | 0.5171 | 0.4683 | 0.4881 |
| Urban | 0.1263 | 0.4773 | 0.6516 | 0.8247 | 0.4957 | 0.5997 | 0.5393 | 0.4585 |
| Towns | 0.0582 | 0.2877 | 0.4812 | 0.7116 | 0.4414 | 0.5500 | 0.4510 | 0.4836 |
| Rural | 0.0294 | 0.1838 | 0.3940 | 0.6500 | 0.3344 | 0.4923 | 0.4488 | 0.5230 |
| **Shanxi** | Total | 0.0397 | 0.2204 | 0.4938 | 0.7740 | 0.3116 | 0.3688 | 0.3793 | 0.3918 |
| Urban | 0.1034 | 0.3891 | 0.6307 | 0.8028 | 0.3845 | 0.4166 | 0.4299 | 0.3709 |
| Towns | 0.0540 | 0.2536 | 0.4963 | 0.7630 | 0.3259 | 0.3598 | 0.3651 | 0.4169 |
| Rural | 0.0208 | 0.1549 | 0.3850 | 0.7347 | 0.2903 | 0.3563 | 0.3553 | 0.3834 |
| **Inner Mongolia** | Total | 0.0584 | 0.3467 | 0.6075 | 0.8291 | 0.4621 | 0.6770 | 0.7175 | 0.6051 |
| Urban | 0.1449 | 0.5406 | 0.7507 | 0.8872 | 0.4645 | 0.6486 | 0.7015 | 0.5680 |
| Towns | 0.0609 | 0.3467 | 0.5743 | 0.8014 | 0.4951 | 0.6739 | 0.7440 | 0.6409 |
| Rural | 0.0286 | 0.2373 | 0.4678 | 0.7792 | 0.4492 | 0.6958 | 0.6792 | 0.5823 |
| **Liaoning** | Total | 0.0438 | 0.2738 | 0.5179 | 0.7623 | 0.6595 | 0.7674 | 0.8150 | 0.7343 |
| Urban | 0.1115 | 0.4478 | 0.6376 | 0.8295 | 0.6108 | 0.7562 | 0.8291 | 0.6971 |
| Towns | 0.0335 | 0.2261 | 0.4250 | 0.6806 | 0.6569 | 0.7742 | 0.8197 | 0.8074 |
| Rural | 0.0141 | 0.1807 | 0.3947 | 0.6542 | 0.6827 | 0.7729 | 0.7814 | 0.7411 |
| **Jilin** | Total | 0.1450 | 0.3735 | 0.5962 | 0.8242 | 0.4720 | 0.5545 | 0.5850 | 0.6784 |
| Urban | 0.3696 | 0.6237 | 0.7391 | 0.8765 | 0.5007 | 0.5725 | 0.6386 | 0.6940 |
| Towns | 0.1694 | 0.4378 | 0.5918 | 0.8196 | 0.5191 | 0.5639 | 0.5793 | 0.6533 |
| Rural | 0.0772 | 0.2683 | 0.4699 | 0.7410 | 0.4466 | 0.5444 | 0.5413 | 0.6908 |
| **Heilongjiang** | Total | 0.0705 | 0.2484 | 0.4677 | 0.7000 | 0.4976 | 0.5894 | 0.6519 | 0.6634 |
| Urban | 0.1984 | 0.4902 | 0.6253 | 0.7688 | 0.5717 | 0.6612 | 0.7010 | 0.6571 |
| Towns | 0.0788 | 0.2474 | 0.4244 | 0.6555 | 0.5354 | 0.6146 | 0.6409 | 0.6749 |
| Rural | 0.0330 | 0.1726 | 0.3331 | 0.6011 | 0.4672 | 0.5567 | 0.6065 | 0.6495 |
| **Shanghai** | Total | 0.0976 | 0.5770 | 0.7890 | 0.9178 | 0.5513 | 0.5600 | 0.4842 | 0.4951 |
| Urban | 0.1177 | 0.6344 | 0.8114 | 0.9239 | 0.5386 | 0.6377 | 0.5002 | 0.4922 |
| Towns | 0.0780 | 0.5440 | 0.6992 | 0.8636 | 0.5692 | 0.5098 | 0.4553 | 0.5254 |
| Rural | 0.0500 | 0.1708 | 0.7127 | 0.8731 | 0.5108 | 0.1795 | 0.3140 | 0.4952 |
| **Jiangsu** | Total | 0.0521 | 0.3952 | 0.7714 | 0.9595 | 0.4608 | 0.6394 | 0.6171 | 0.5413 |
| Urban | 0.0957 | 0.5526 | 0.8358 | 0.9674 | 0.4782 | 0.6615 | 0.6178 | 0.5108 |
| Towns | 0.0818 | 0.4262 | 0.7557 | 0.9513 | 0.4871 | 0.6473 | 0.6256 | 0.5821 |
| Rural | 0.0291 | 0.2700 | 0.6067 | 0.9337 | 0.4477 | 0.6185 | 0.5862 | 0.5749 |
| **Zhejiang** | Total | 0.0690 | 0.4711 | 0.7438 | 0.9257 | 0.3997 | 0.5454 | 0.5509 | 0.5596 |
| Urban | 0.1461 | 0.5952 | 0.7860 | 0.9281 | 0.4401 | 0.5521 | 0.5559 | 0.5509 |
| Towns | 0.0528 | 0.4486 | 0.7164 | 0.9237 | 0.3942 | 0.5663 | 0.5717 | 0.5840 |
| Rural | 0.0227 | 0.3617 | 0.6804 | 0.9164 | 0.3711 | 0.5013 | 0.4874 | 0.5351 |
| **Anhui** | Total | 0.0323 | 0.1694 | 0.4592 | 0.7569 | 0.3871 | 0.5983 | 0.5209 | 0.5312 |
| Urban | 0.0942 | 0.3393 | 0.5912 | 0.8343 | 0.5038 | 0.6272 | 0.5437 | 0.4866 |
| Towns | 0.0458 | 0.1911 | 0.4683 | 0.7440 | 0.4763 | 0.6034 | 0.5214 | 0.5565 |
| Rural | 0.0180 | 0.1247 | 0.3927 | 0.6810 | 0.3486 | 0.5903 | 0.5105 | 0.5419 |
| **Fujian** | Total | 0.0132 | 0.1851 | 0.4637 | 0.7244 | 0.2839 | 0.5789 | 0.5828 | 0.4750 |
| Urban | 0.0427 | 0.3724 | 0.6611 | 0.8233 | 0.3518 | 0.5687 | 0.4956 | 0.4284 |
| Towns | 0.0144 | 0.1525 | 0.3925 | 0.6660 | 0.3393 | 0.5974 | 0.6416 | 0.5194 |
| Rural | 0.0052 | 0.0950 | 0.3169 | 0.5999 | 0.2446 | 0.5687 | 0.6105 | 0.4976 |
| **Jiangxi** | Total | 0.0370 | 0.1738 | 0.4473 | 0.7050 | 0.3875 | 0.5082 | 0.5068 | 0.4594 |
| Urban | 0.1209 | 0.4230 | 0.6357 | 0.7429 | 0.5128 | 0.5009 | 0.5731 | 0.4935 |
| Towns | 0.0427 | 0.2497 | 0.4520 | 0.7156 | 0.4072 | 0.5510 | 0.5241 | 0.4701 |
| Rural | 0.0215 | 0.1232 | 0.3416 | 0.6281 | 0.3582 | 0.4962 | 0.4529 | 0.3880 |
| **Shandong** | Total | 0.0636 | 0.3169 | 0.5878 | 0.9193 | 0.4768 | 0.5616 | 0.4549 | 0.4985 |
| Urban | 0.1679 | 0.6050 | 0.7709 | 0.9493 | 0.4597 | 0.5293 | 0.4455 | 0.4641 |
| Towns | 0.0725 | 0.3746 | 0.5590 | 0.9098 | 0.4493 | 0.5243 | 0.4454 | 0.5059 |
| Rural | 0.0265 | 0.2128 | 0.4330 | 0.8621 | 0.4911 | 0.5859 | 0.4760 | 0.5715 |
| **Henan** | Total | 0.0364 | 0.1691 | 0.4399 | 0.7300 | 0.3401 | 0.4555 | 0.4667 | 0.4540 |
| Urban | 0.1299 | 0.4052 | 0.6225 | 0.8209 | 0.4187 | 0.5264 | 0.5103 | 0.4265 |
| Towns | 0.0520 | 0.1972 | 0.4398 | 0.7198 | 0.3677 | 0.4230 | 0.4417 | 0.4424 |
| Rural | 0.0204 | 0.1233 | 0.3633 | 0.6677 | 0.3244 | 0.4516 | 0.4678 | 0.4918 |
| **Hubei** | Total | 0.0685 | 0.1963 | 0.4327 | 0.7141 | 0.5559 | 0.6974 | 0.6400 | 0.5029 |
| Urban | 0.1575 | 0.4453 | 0.5761 | 0.7983 | 0.5473 | 0.6962 | 0.6577 | 0.4751 |
| Towns | 0.0750 | 0.2005 | 0.3965 | 0.6655 | 0.6014 | 0.7115 | 0.6518 | 0.5505 |
| Rural | 0.0288 | 0.1094 | 0.3164 | 0.5756 | 0.5507 | 0.6917 | 0.6058 | 0.4824 |
| **Hunan** | Total | 0.0282 | 0.1755 | 0.4284 | 0.7796 | 0.5007 | 0.6622 | 0.5639 | 0.4919 |
| Urban | 0.1178 | 0.4479 | 0.6296 | 0.8255 | 0.5982 | 0.6714 | 0.5754 | 0.4576 |
| Towns | 0.0258 | 0.1738 | 0.3992 | 0.7702 | 0.5339 | 0.6573 | 0.5735 | 0.5250 |
| Rural | 0.0113 | 0.1220 | 0.3321 | 0.7190 | 0.4702 | 0.6632 | 0.5448 | 0.4749 |
| **Guangdong** | Total | 0.0510 | 0.2347 | 0.5118 | 0.8442 | 0.3467 | 0.6003 | 0.5773 | 0.4879 |
| Urban | 0.1318 | 0.4919 | 0.6396 | 0.8917 | 0.3735 | 0.5552 | 0.4987 | 0.4183 |
| Towns | 0.0321 | 0.2034 | 0.4167 | 0.7884 | 0.4053 | 0.6372 | 0.6865 | 0.5911 |
| Rural | 0.0195 | 0.0990 | 0.3204 | 0.7480 | 0.3117 | 0.6008 | 0.6381 | 0.5974 |
| **Guangxi** | Total | 0.0107 | 0.1455 | 0.3768 | 0.6370 | 0.4064 | 0.5286 | 0.5972 | 0.5353 |
| Urban | 0.0434 | 0.3853 | 0.5828 | 0.7987 | 0.4467 | 0.6142 | 0.5424 | 0.4445 |
| Towns | 0.0108 | 0.1850 | 0.3931 | 0.6352 | 0.4945 | 0.6365 | 0.6661 | 0.5538 |
| Rural | 0.0052 | 0.0989 | 0.2787 | 0.5008 | 0.3722 | 0.4738 | 0.5721 | 0.5937 |
| **Hainan** | Total | 0.0255 | 0.0906 | 0.2564 | 0.5907 | 0.2932 | 0.4261 | 0.4917 | 0.4027 |
| Urban | 0.1282 | 0.3321 | 0.4068 | 0.6979 | 0.3441 | 0.3896 | 0.4493 | 0.3235 |
| Towns | 0.0140 | 0.0824 | 0.2375 | 0.5728 | 0.3633 | 0.4707 | 0.5472 | 0.4621 |
| Rural | 0.0094 | 0.0465 | 0.1507 | 0.4593 | 0.2557 | 0.4093 | 0.4557 | 0.4408 |
| **Chongqing** | Total | 0.0472 | 0.2259 | 0.4890 | 0.7335 | 0.2937 | 0.3965 | 0.4758 | 0.5183 |
| Urban | 0.1609 | 0.5800 | 0.6505 | 0.8344 | 0.4258 | 0.4494 | 0.4902 | 0.4728 |
| Towns | 0.0657 | 0.2373 | 0.4254 | 0.6333 | 0.3855 | 0.4314 | 0.4895 | 0.5728 |
| Rural | 0.0238 | 0.1237 | 0.3786 | 0.6079 | 0.2589 | 0.3508 | 0.4333 | 0.5549 |
| **Sichuan** | Total | 0.0321 | 0.1624 | 0.3741 | 0.6817 | 0.3823 | 0.4591 | 0.4609 | 0.5194 |
| Urban | 0.1455 | 0.4033 | 0.5584 | 0.8291 | 0.4711 | 0.5098 | 0.4936 | 0.4249 |
| Towns | 0.0363 | 0.1648 | 0.3500 | 0.6066 | 0.4407 | 0.4990 | 0.4803 | 0.5859 |
| Rural | 0.0151 | 0.0968 | 0.2906 | 0.5436 | 0.3546 | 0.4140 | 0.4146 | 0.5594 |
| **Guizhou** | Total | 0.0109 | 0.1032 | 0.3805 | 0.7363 | 0.2026 | 0.3931 | 0.5434 | 0.5684 |
| Urban | 0.0649 | 0.2756 | 0.5146 | 0.8015 | 0.3438 | 0.4590 | 0.4615 | 0.4660 |
| Towns | 0.0104 | 0.1001 | 0.3689 | 0.7358 | 0.3246 | 0.5197 | 0.6015 | 0.6166 |
| Rural | 0.0048 | 0.0844 | 0.3440 | 0.6701 | 0.1510 | 0.3425 | 0.5246 | 0.5957 |
| **Yunnan** | Total | 0.0190 | 0.1743 | 0.4126 | 0.7436 | 0.3198 | 0.4681 | 0.5292 | 0.7303 |
| Urban | 0.1275 | 0.4684 | 0.6398 | 0.8567 | 0.4588 | 0.5011 | 0.5491 | 0.5954 |
| Towns | 0.0328 | 0.2312 | 0.4123 | 0.7242 | 0.4571 | 0.6013 | 0.6351 | 0.8360 |
| Rural | 0.0089 | 0.1346 | 0.3570 | 0.6989 | 0.2854 | 0.4268 | 0.4751 | 0.7276 |
| **Tibet** | Total | 0.0098 | 0.1121 | 0.4145 | 0.6434 | 0.0794 | 0.2251 | 0.3958 | 0.5263 |
| Urban | 0.0223 | 0.2355 | 0.5020 | 0.7296 | 0.2257 | 0.4617 | 0.5605 | 0.6426 |
| Towns | 0.0169 | 0.1195 | 0.4439 | 0.6417 | 0.1578 | 0.3547 | 0.4502 | 0.5873 |
| Rural | 0.0046 | 0.0915 | 0.3773 | 0.6126 | 0.0202 | 0.1374 | 0.3264 | 0.4518 |
| **Shaanxi** | Total | 0.0295 | 0.2440 | 0.5895 | 0.8550 | 0.2327 | 0.3396 | 0.3858 | 0.4234 |
| Urban | 0.1216 | 0.4783 | 0.7263 | 0.8998 | 0.3751 | 0.4600 | 0.3881 | 0.3784 |
| Towns | 0.0339 | 0.2625 | 0.5785 | 0.8347 | 0.2853 | 0.3494 | 0.3880 | 0.4684 |
| Rural | 0.0145 | 0.1939 | 0.4522 | 0.7599 | 0.2036 | 0.3139 | 0.3788 | 0.4402 |
| **Gansu** | Total | 0.0235 | 0.2073 | 0.5339 | 0.7891 | 0.3048 | 0.3806 | 0.3888 | 0.5657 |
| Urban | 0.0828 | 0.3761 | 0.6388 | 0.8400 | 0.4555 | 0.5388 | 0.5129 | 0.5796 |
| Towns | 0.0224 | 0.2275 | 0.5682 | 0.8051 | 0.3133 | 0.3973 | 0.3891 | 0.5842 |
| Rural | 0.0145 | 0.1749 | 0.4800 | 0.7308 | 0.2788 | 0.3509 | 0.3488 | 0.5302 |
| **Qinghai** | Total | 0.0501 | 0.2756 | 0.5473 | 0.7330 | 0.3136 | 0.6522 | 0.6003 | 0.5561 |
| Urban | 0.1232 | 0.4089 | 0.6821 | 0.8251 | 0.5172 | 0.6734 | 0.5366 | 0.4827 |
| Towns | 0.0460 | 0.2791 | 0.5533 | 0.7269 | 0.3833 | 0.6955 | 0.6234 | 0.6106 |
| Rural | 0.0351 | 0.2389 | 0.4618 | 0.6536 | 0.2355 | 0.6244 | 0.6147 | 0.5606 |
| **Ningxia** | Total | 0.0519 | 0.2461 | 0.5443 | 0.7652 | 0.4157 | 0.5263 | 0.4309 | 0.5848 |
| Urban | 0.1263 | 0.4675 | 0.6570 | 0.8532 | 0.5238 | 0.5999 | 0.4934 | 0.5276 |
| Towns | 0.0589 | 0.2852 | 0.5485 | 0.7496 | 0.4190 | 0.5173 | 0.4371 | 0.6158 |
| Rural | 0.0288 | 0.1419 | 0.4595 | 0.6478 | 0.3847 | 0.5016 | 0.3808 | 0.6327 |
| **Xinjiang** | Total | 0.0603 | 0.2208 | 0.4134 | 0.6125 | 0.2761 | 0.4001 | 0.3728 | 0.3602 |
| Urban | 0.1352 | 0.4276 | 0.6336 | 0.7944 | 0.4392 | 0.5318 | 0.4428 | 0.4600 |
| Towns | 0.0714 | 0.2275 | 0.4515 | 0.6346 | 0.3744 | 0.4950 | 0.4481 | 0.4172 |
| Rural | 0.0403 | 0.1662 | 0.3055 | 0.4993 | 0.2204 | 0.3457 | 0.3032 | 0.2689 |


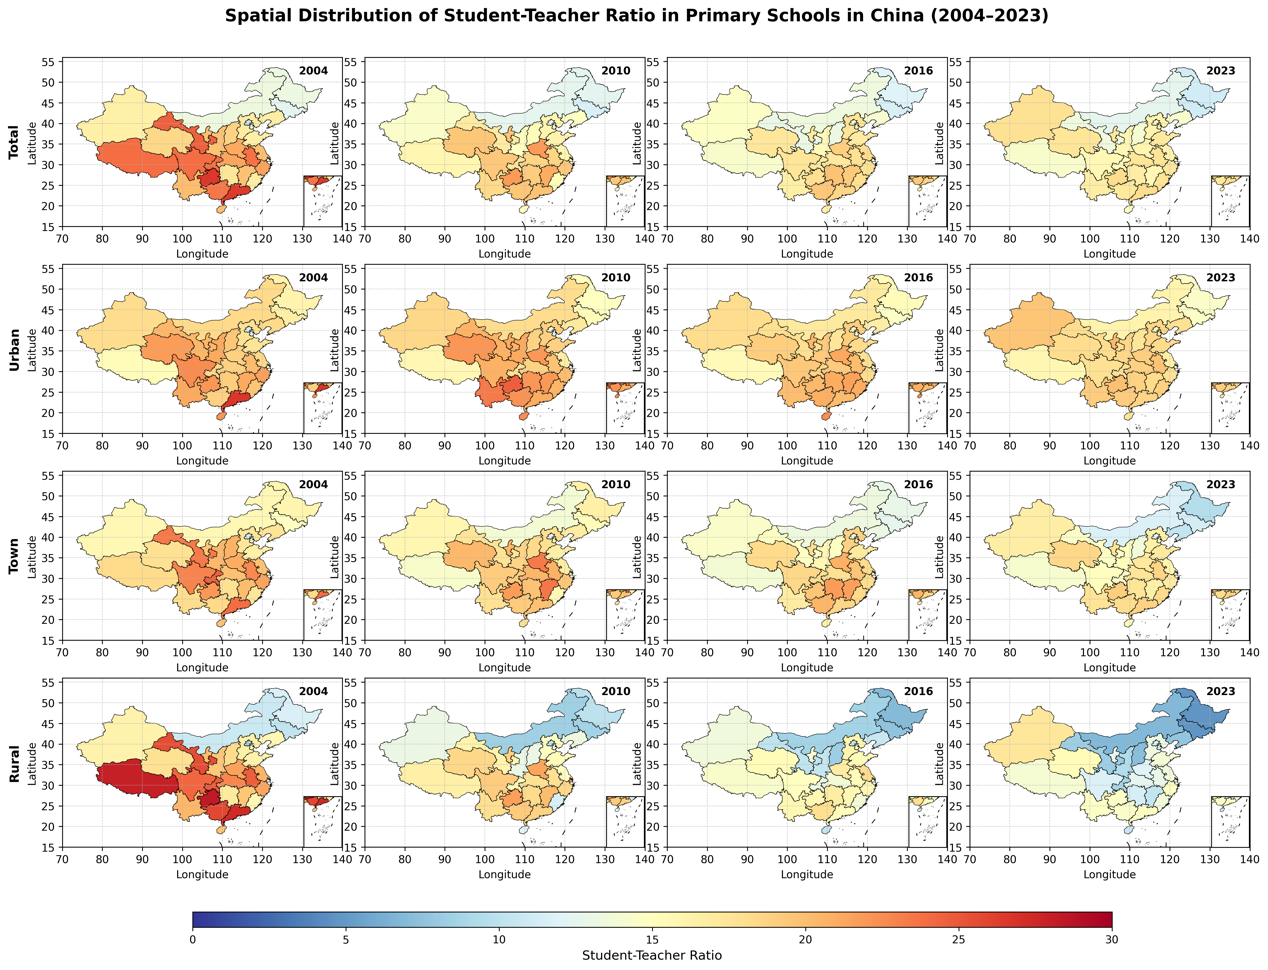


**Figure S1.** Spatial Distribution Characteristics of Provincial Student-Teacher Ratios in China (2004-2023), stratified by total, urban, town, and rural area.


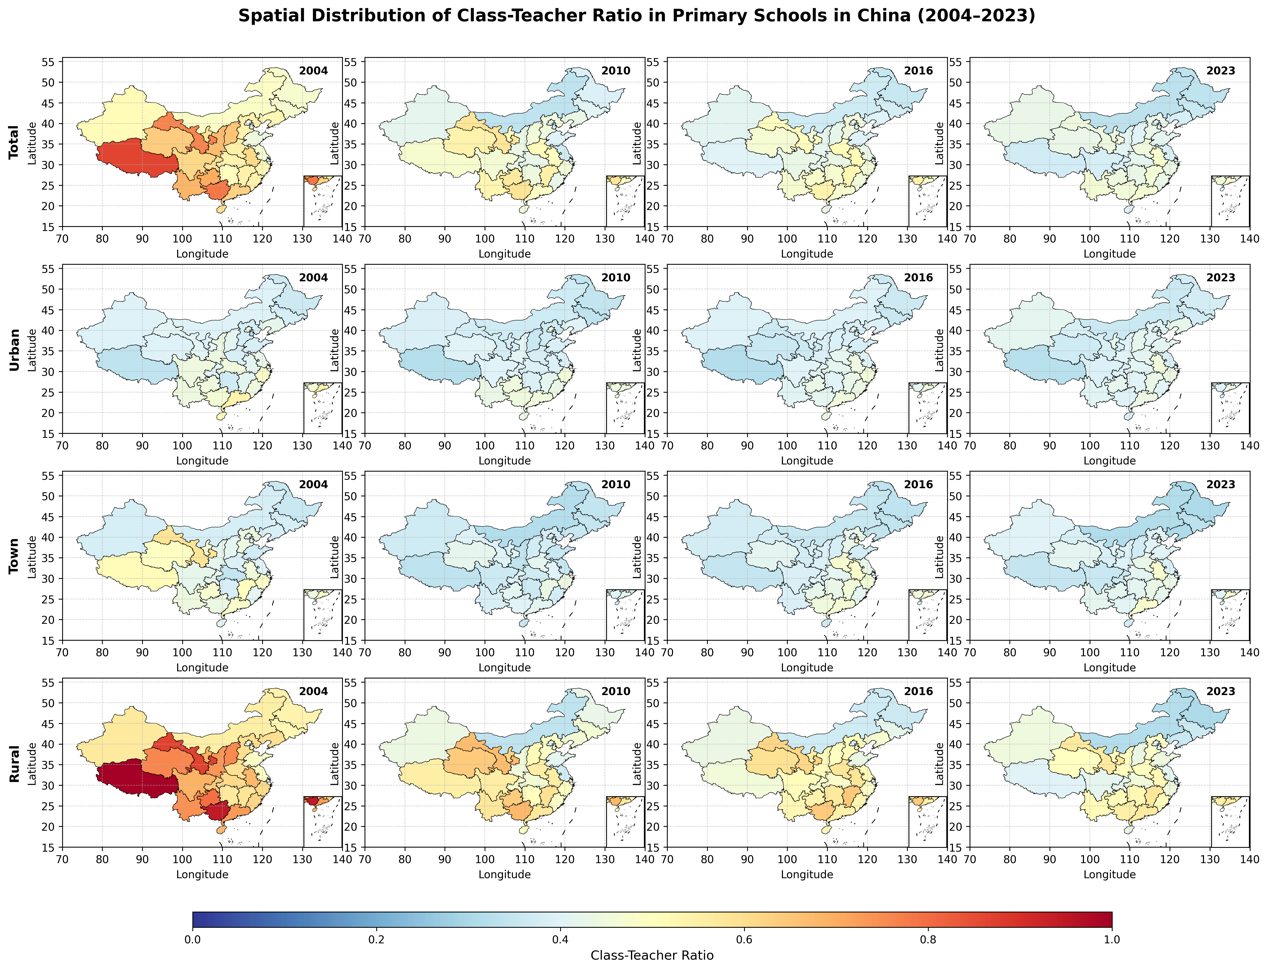


**Figure S2.** Spatial Distribution Characteristics of Provincial Class-Teacher Ratios in China (2004-2023), stratified by total, urban, town, and rural area.


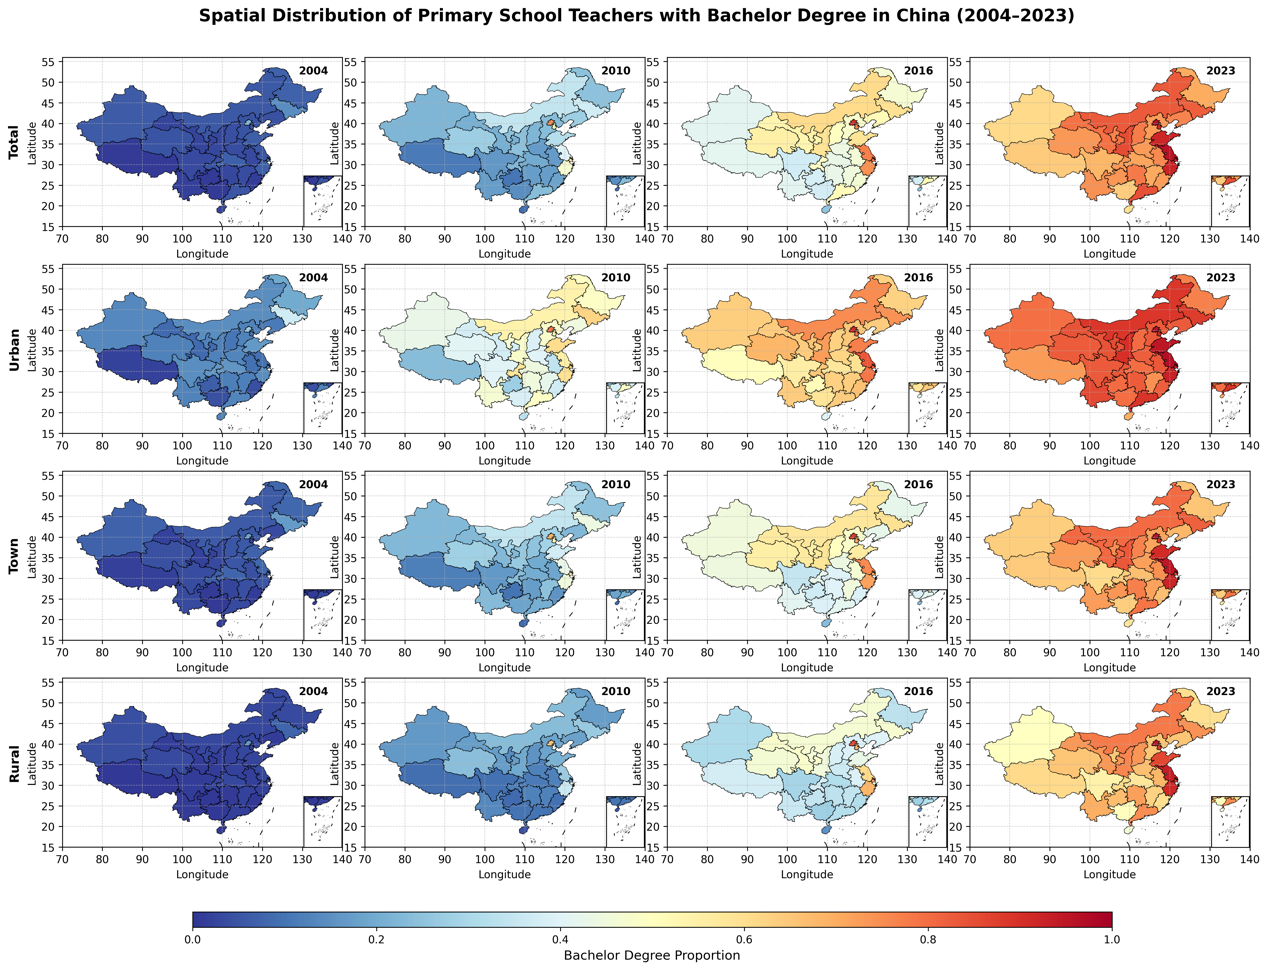


**Figure S3.** Spatial Distribution Characteristics of Provincial the proportion of bachelor-and-above teachers in China (2004-2023), stratified by total, urban, town, and rural area.


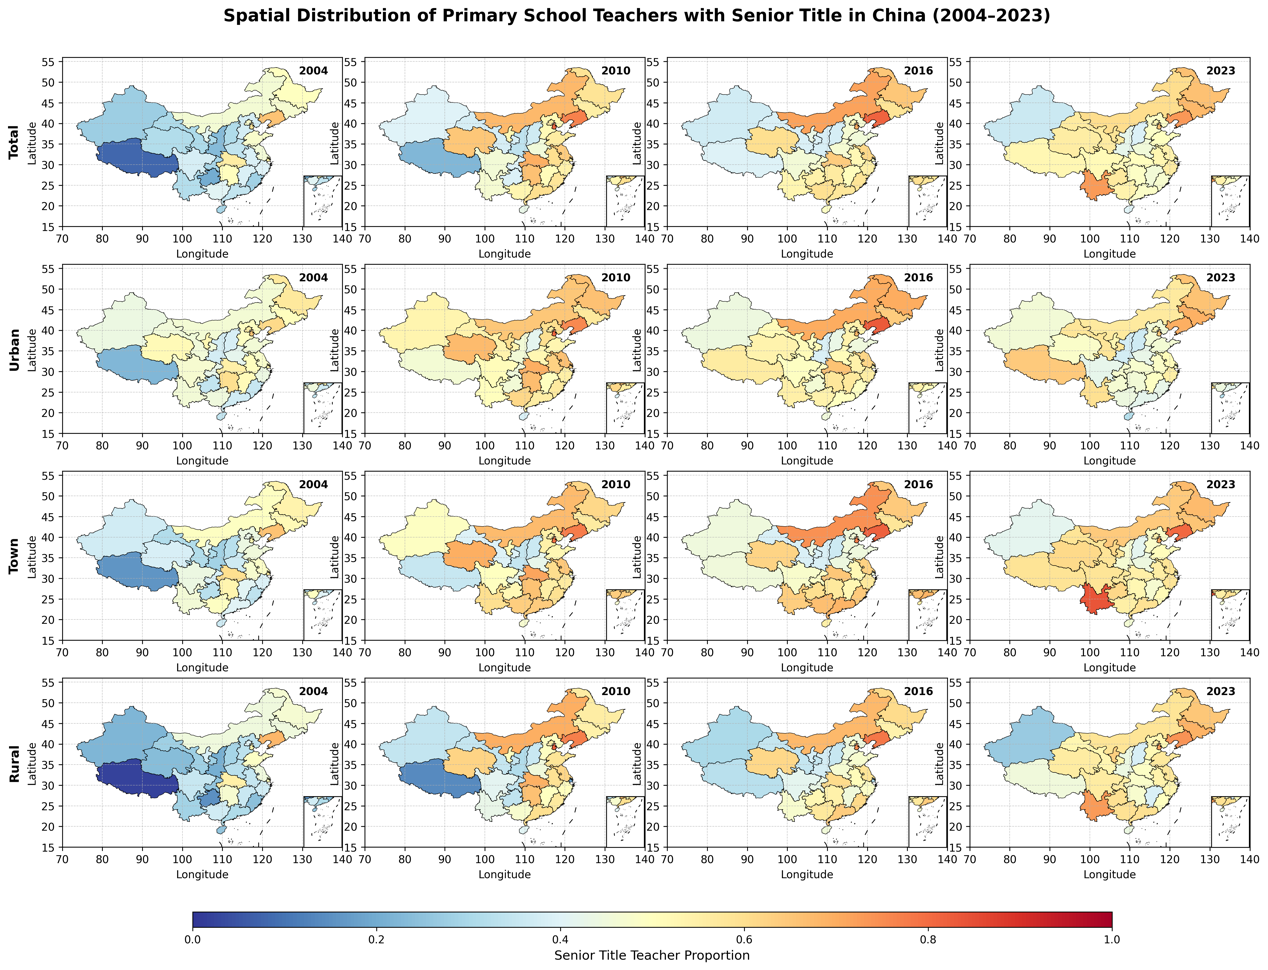


**Figure S4.** Spatial Distribution Characteristics of Provincial the proportion of mid-to-senior title teachers in China (2004-2023), stratified by total, urban, town, and rural area.

## S2. Changes in Standard Deviational Ellipses of Primary School Teacher Allocation Indicator

**

**

**Figure S5.** The Standard Deviational Ellipses for the four teacher-allocation indicators (STR, CTR, PBAT, and PMSTT) across the 2004, 2010, 2016, 2023, stratified by total, urban, town, and rural area.

## S3. Spatial autocorrelation analysis of primary school teacher resource allocation using Global Moran’s I and LISA cluster maps.

**
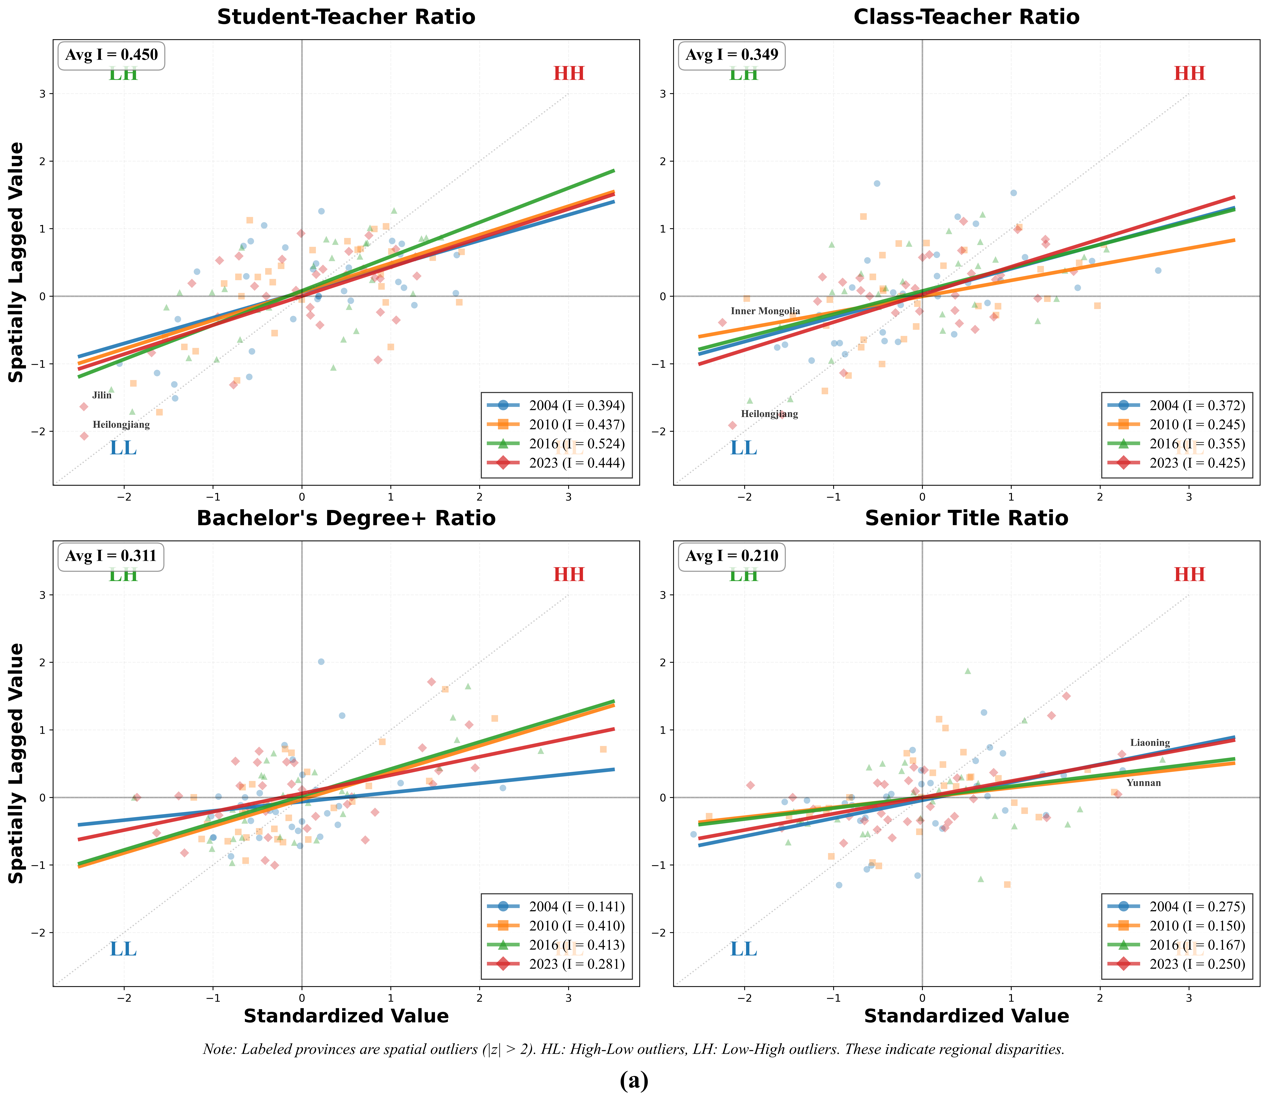
**

**Figure S6.** The spatial autocorrelation analysis results for the four teacher-allocation indicators (STR, CTR, PBAT, and PMSTT) across 2004, 2010, 2016, 2023 (Global Moran’s I values)

**
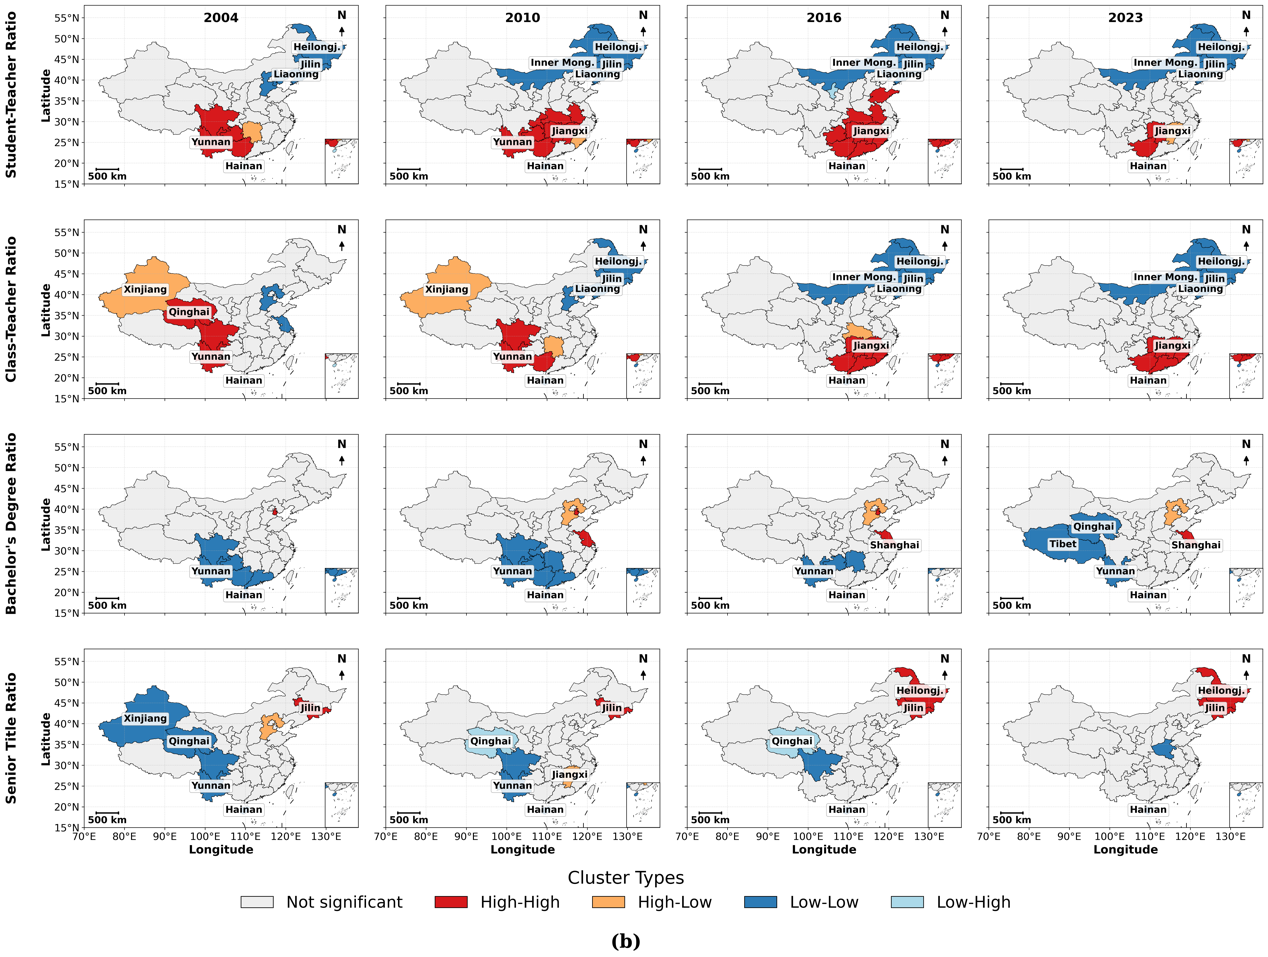
**

**Figure S7.** The spatial autocorrelation analysis results for the four teacher-allocation indicators (STR, CTR, PBAT, and PMSTT) across 2004, 2010, 2016, 2023 (LISA cluster maps)

## S4. Change Trends in Primary Teacher Allocation Using Theil-Sen Slope (Three Stage)


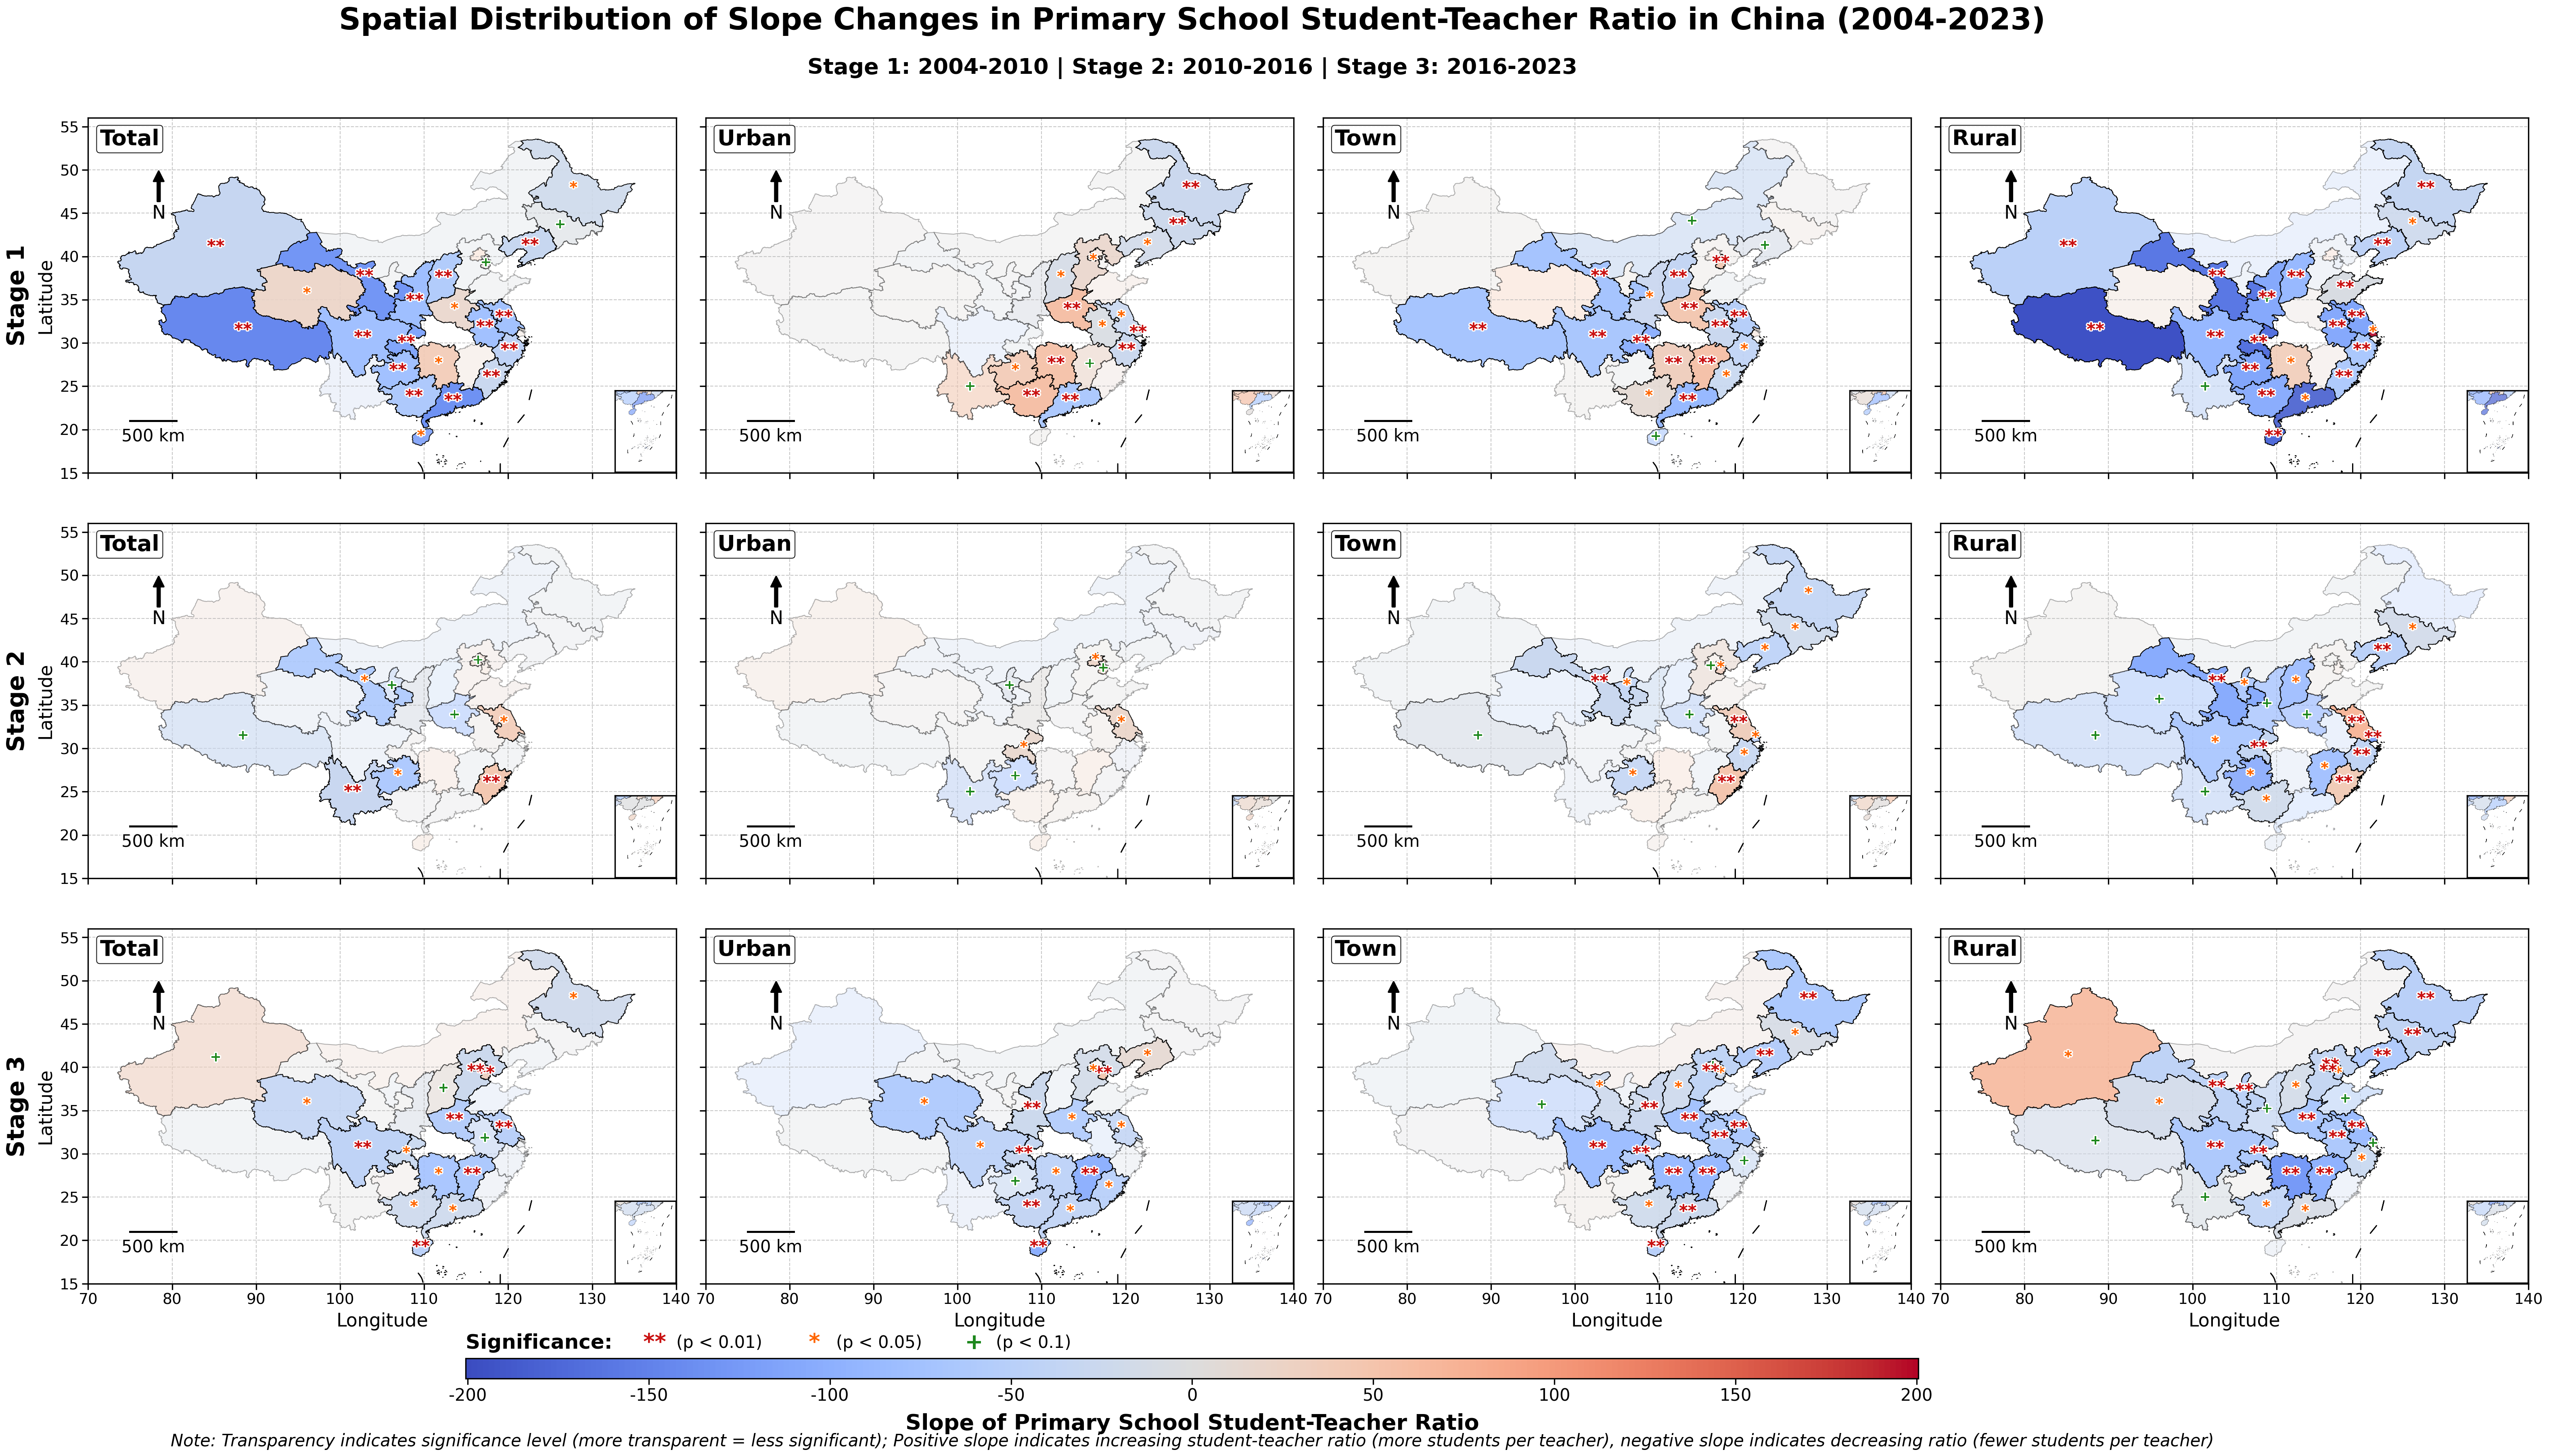


**Figure S8.** The Theil–Sen trend classification for STR across three sub-periods (2004–2010, 2010–2016, 2016–2023), stratified by total, urban, town, and rural area.


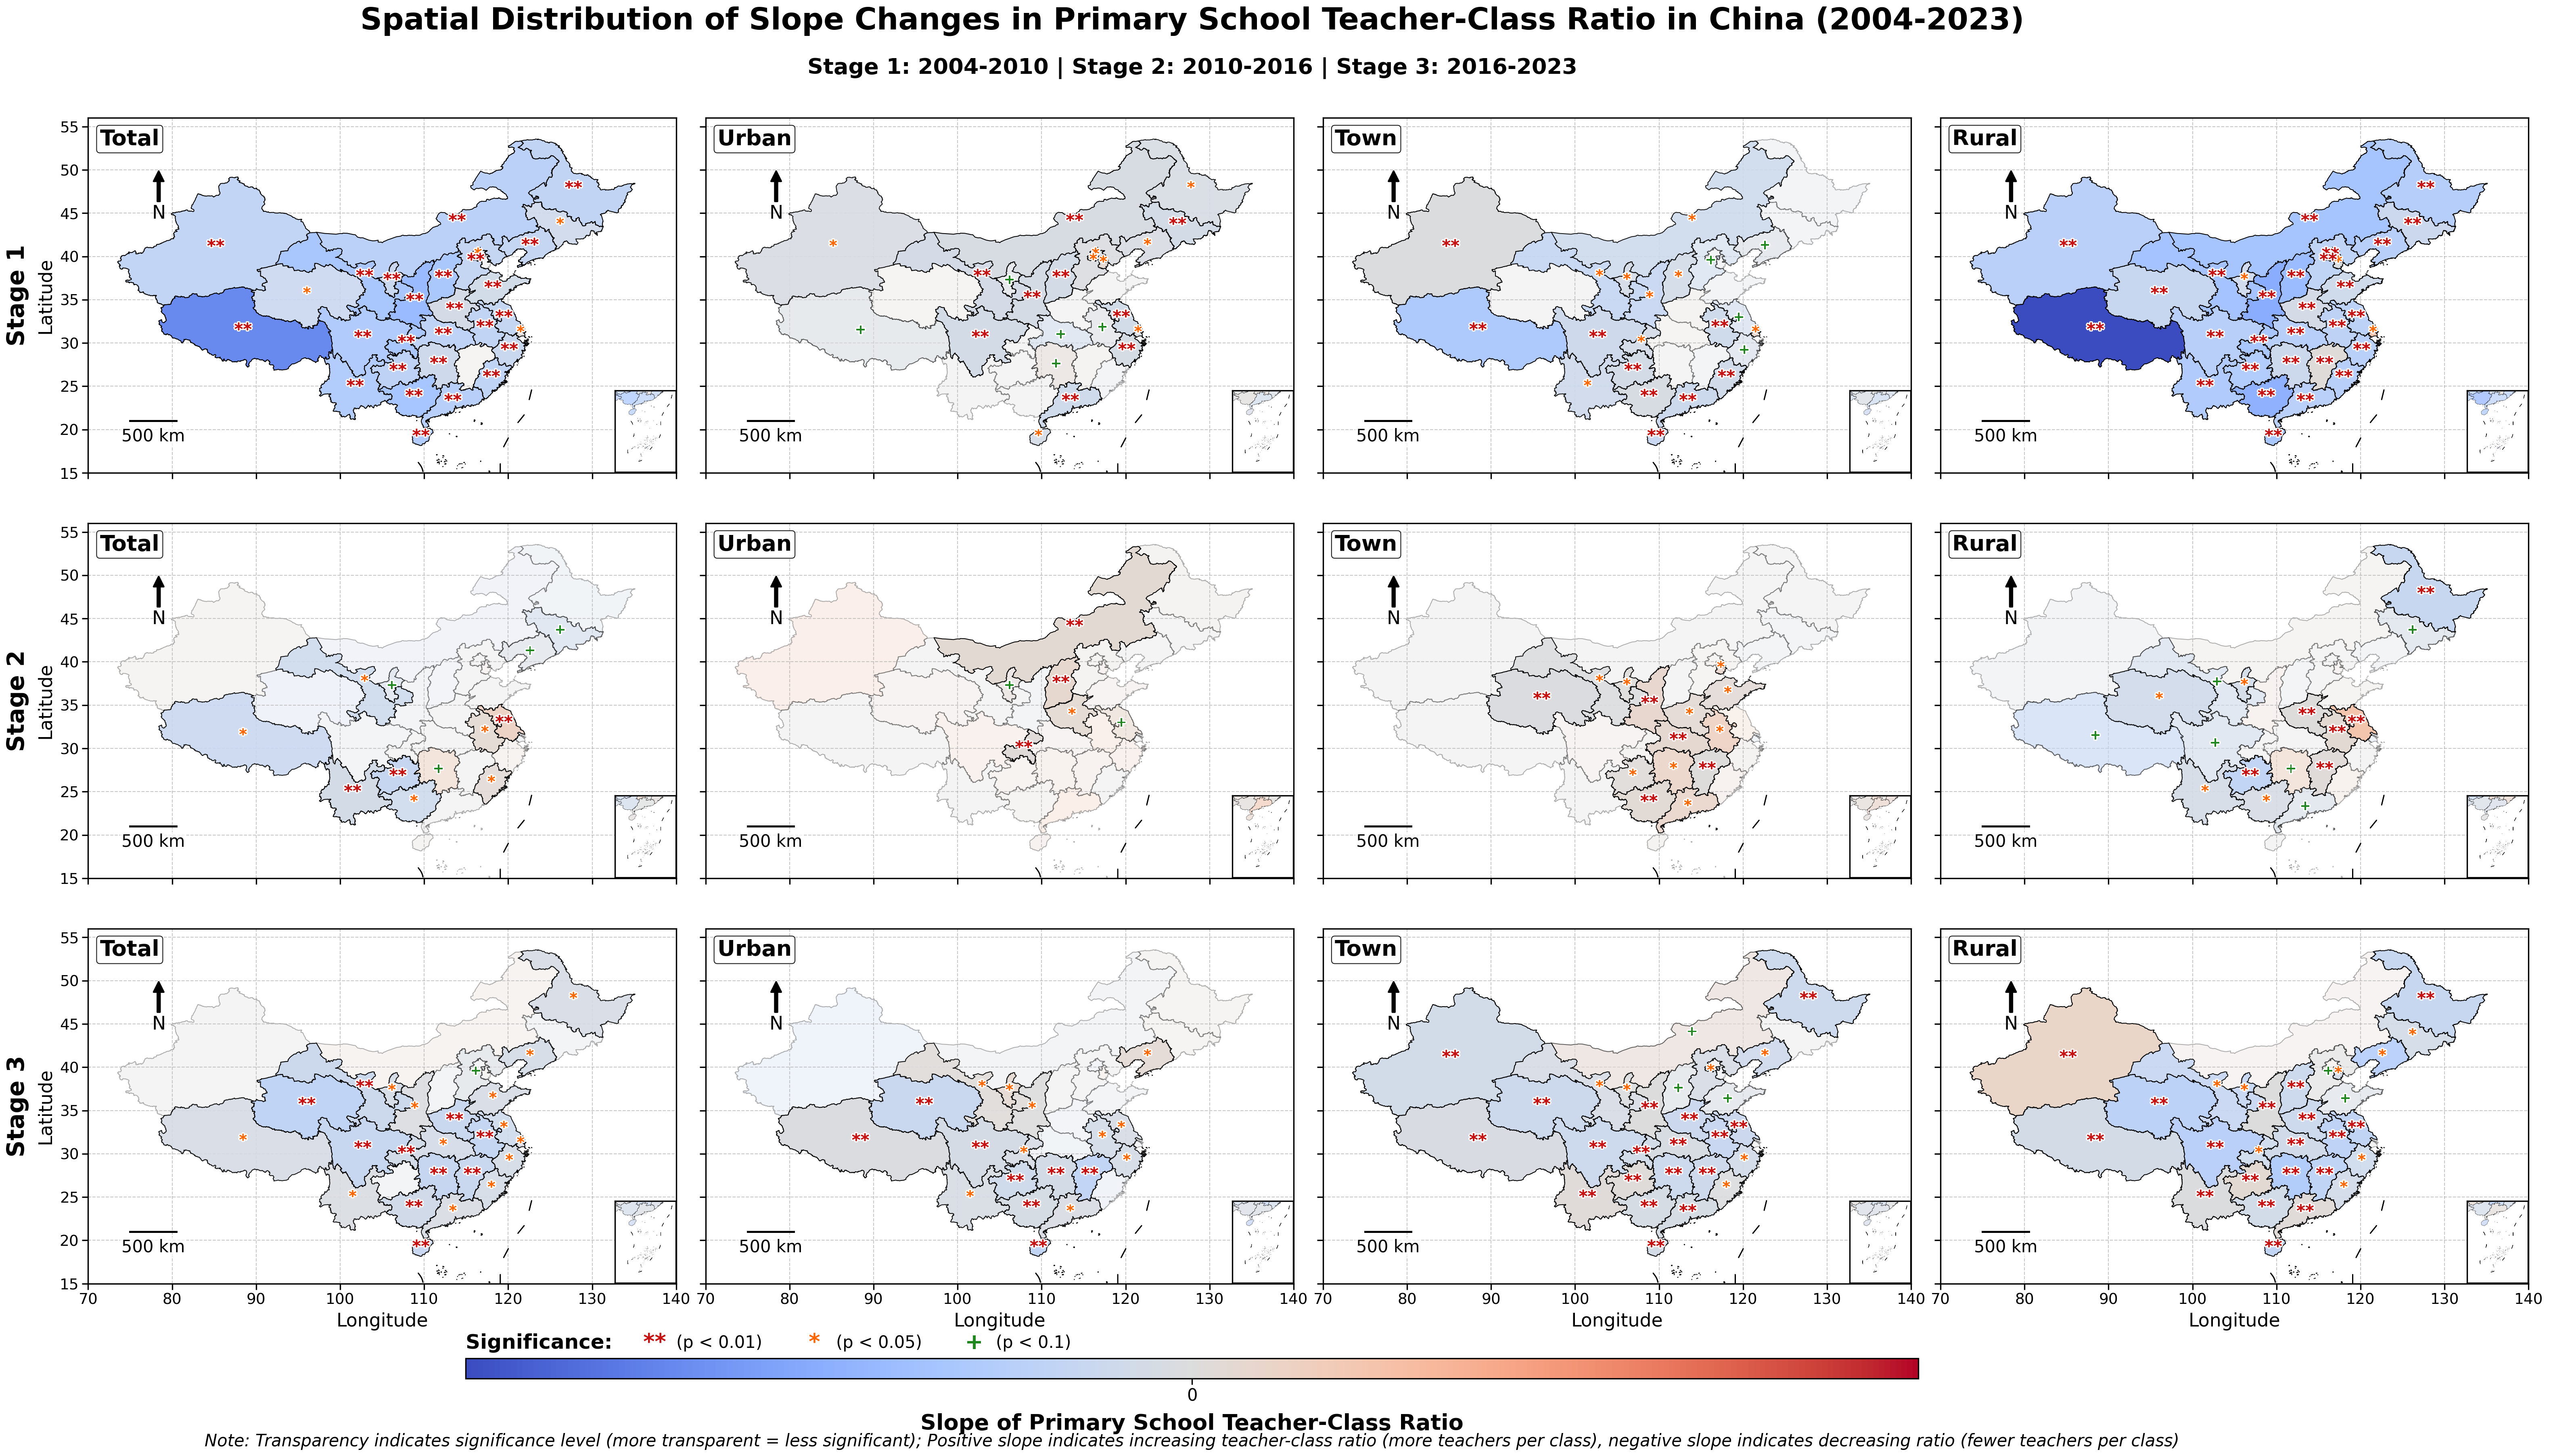


**Figure S9.** The Theil–Sen trend classification for CTR across three sub-periods (2004–2010, 2010–2016, 2016–2023), stratified by total, urban, town, and rural area.


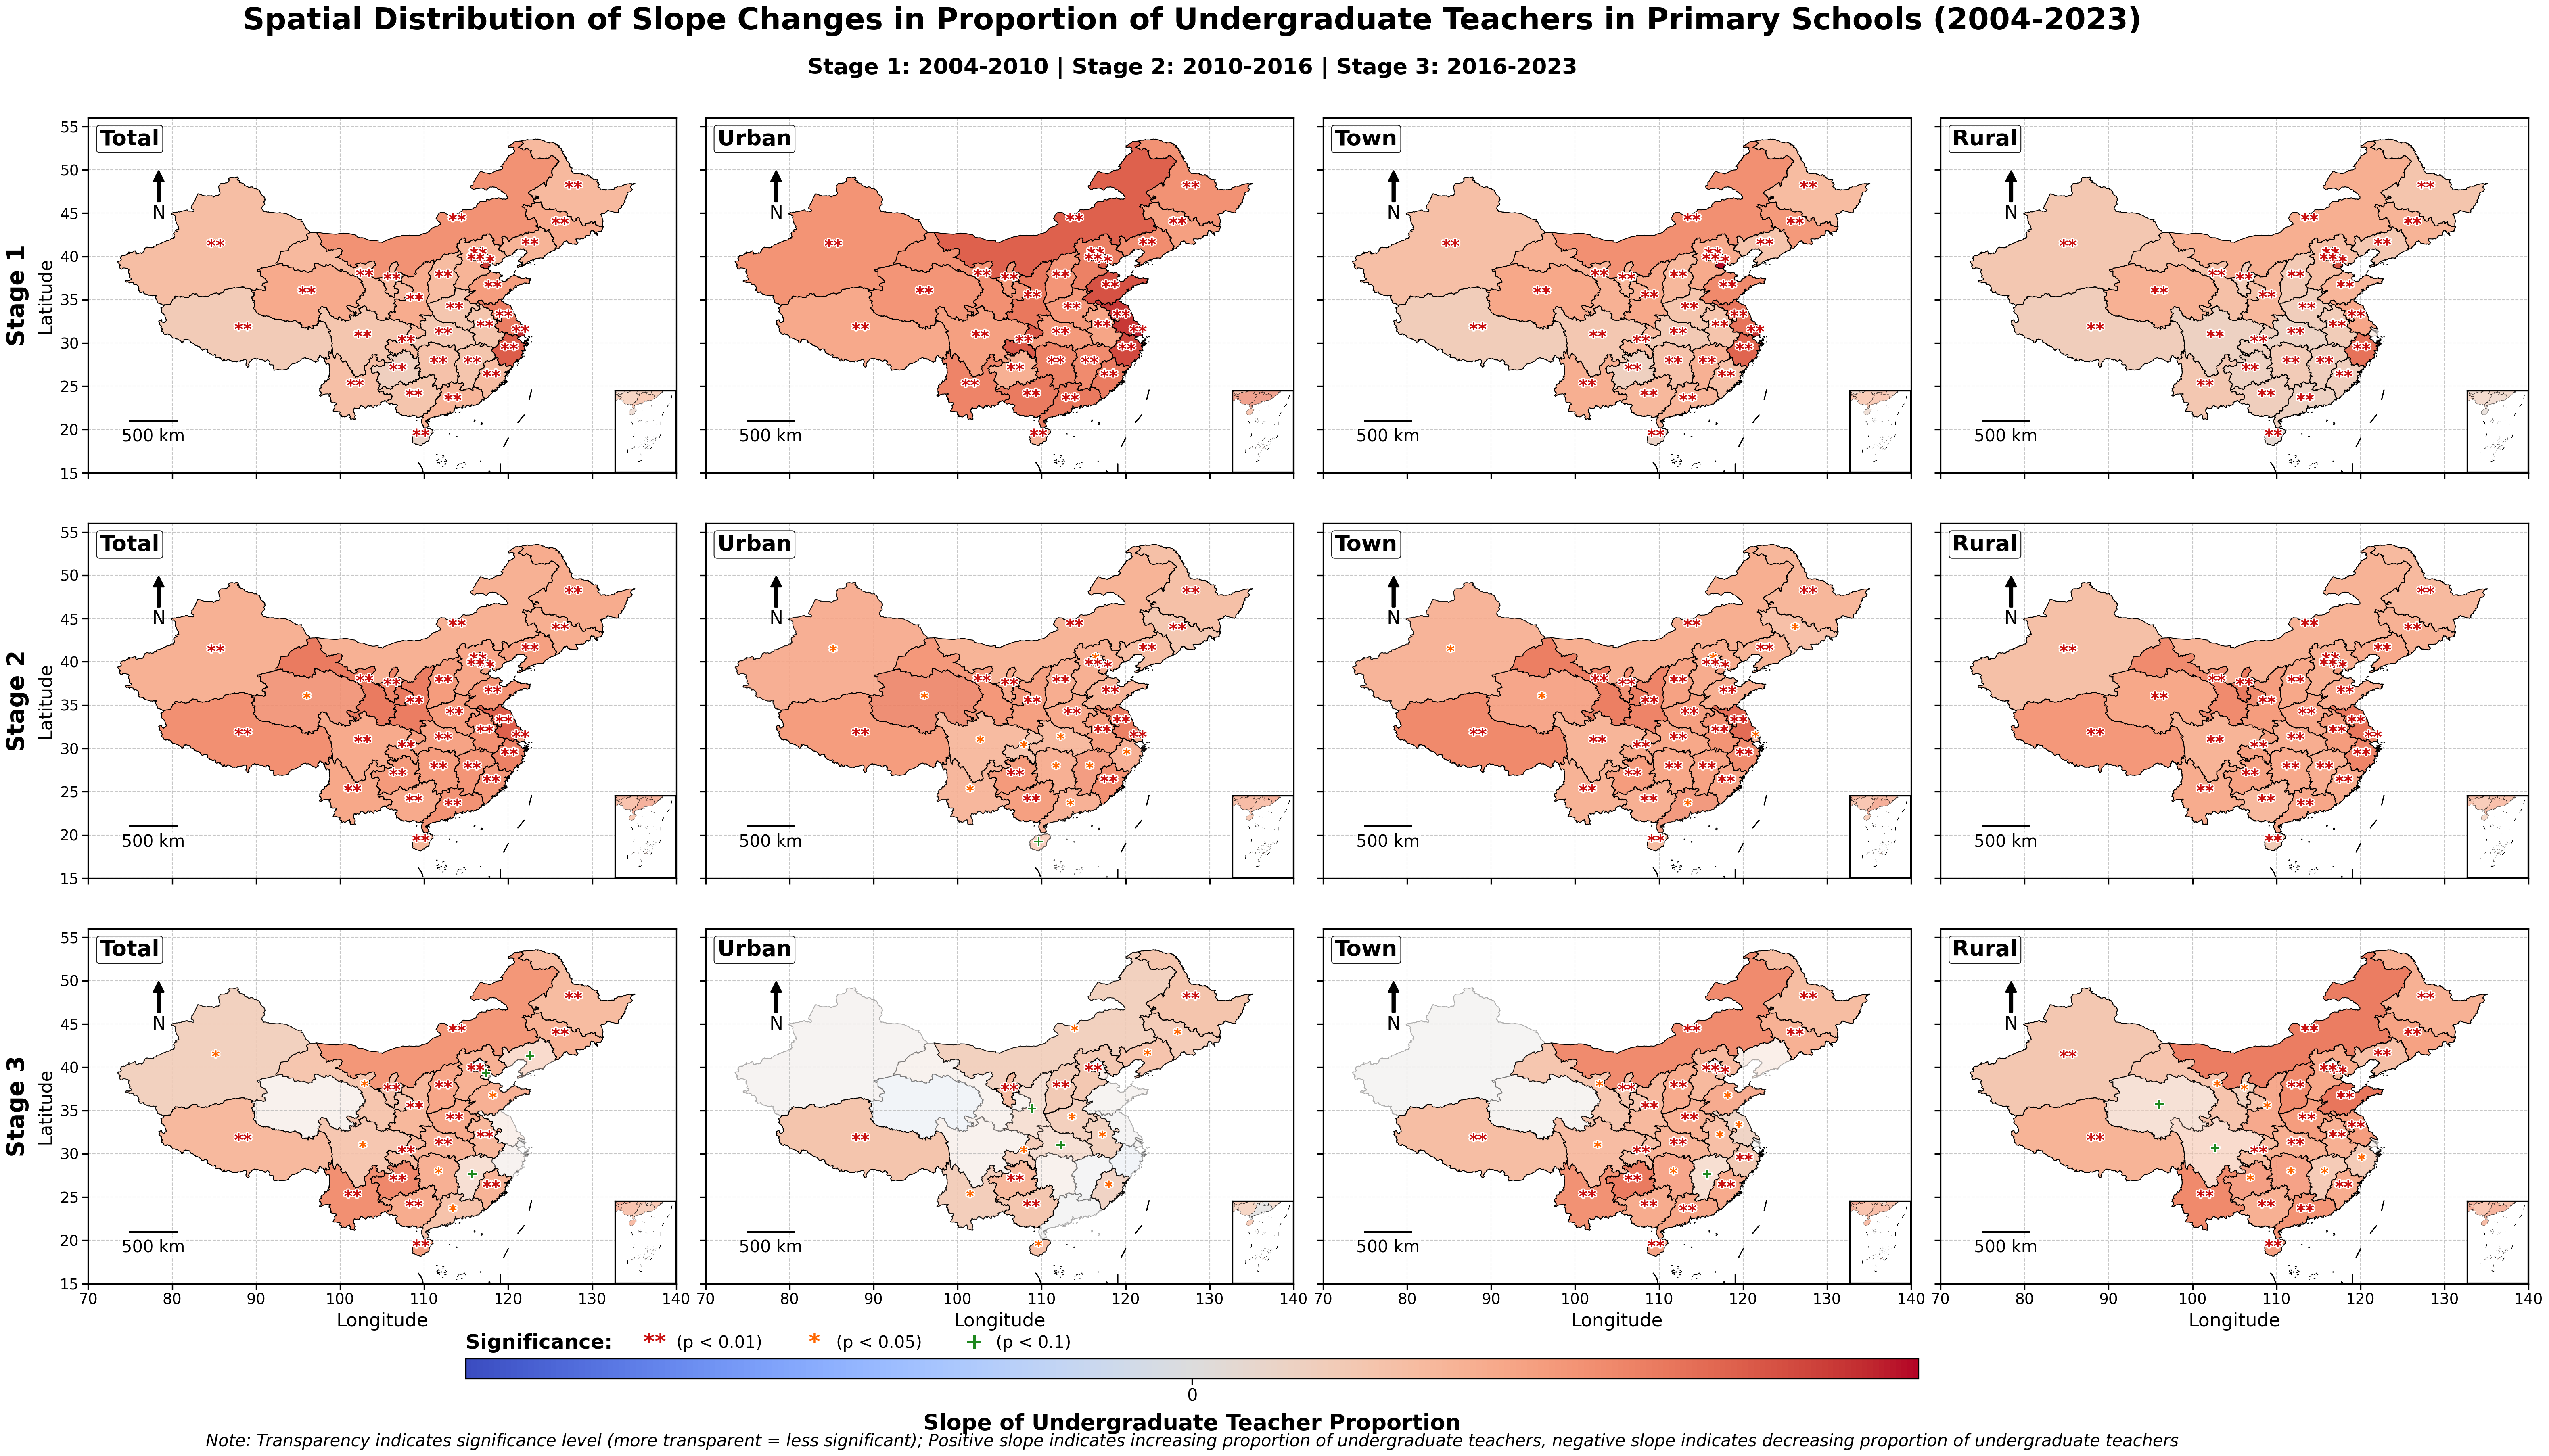


**Figure S10.** The Theil–Sen trend classification for PBAT across three sub-periods (2004–2010, 2010–2016, 2016–2023), stratified by total, urban, town, and rural area.


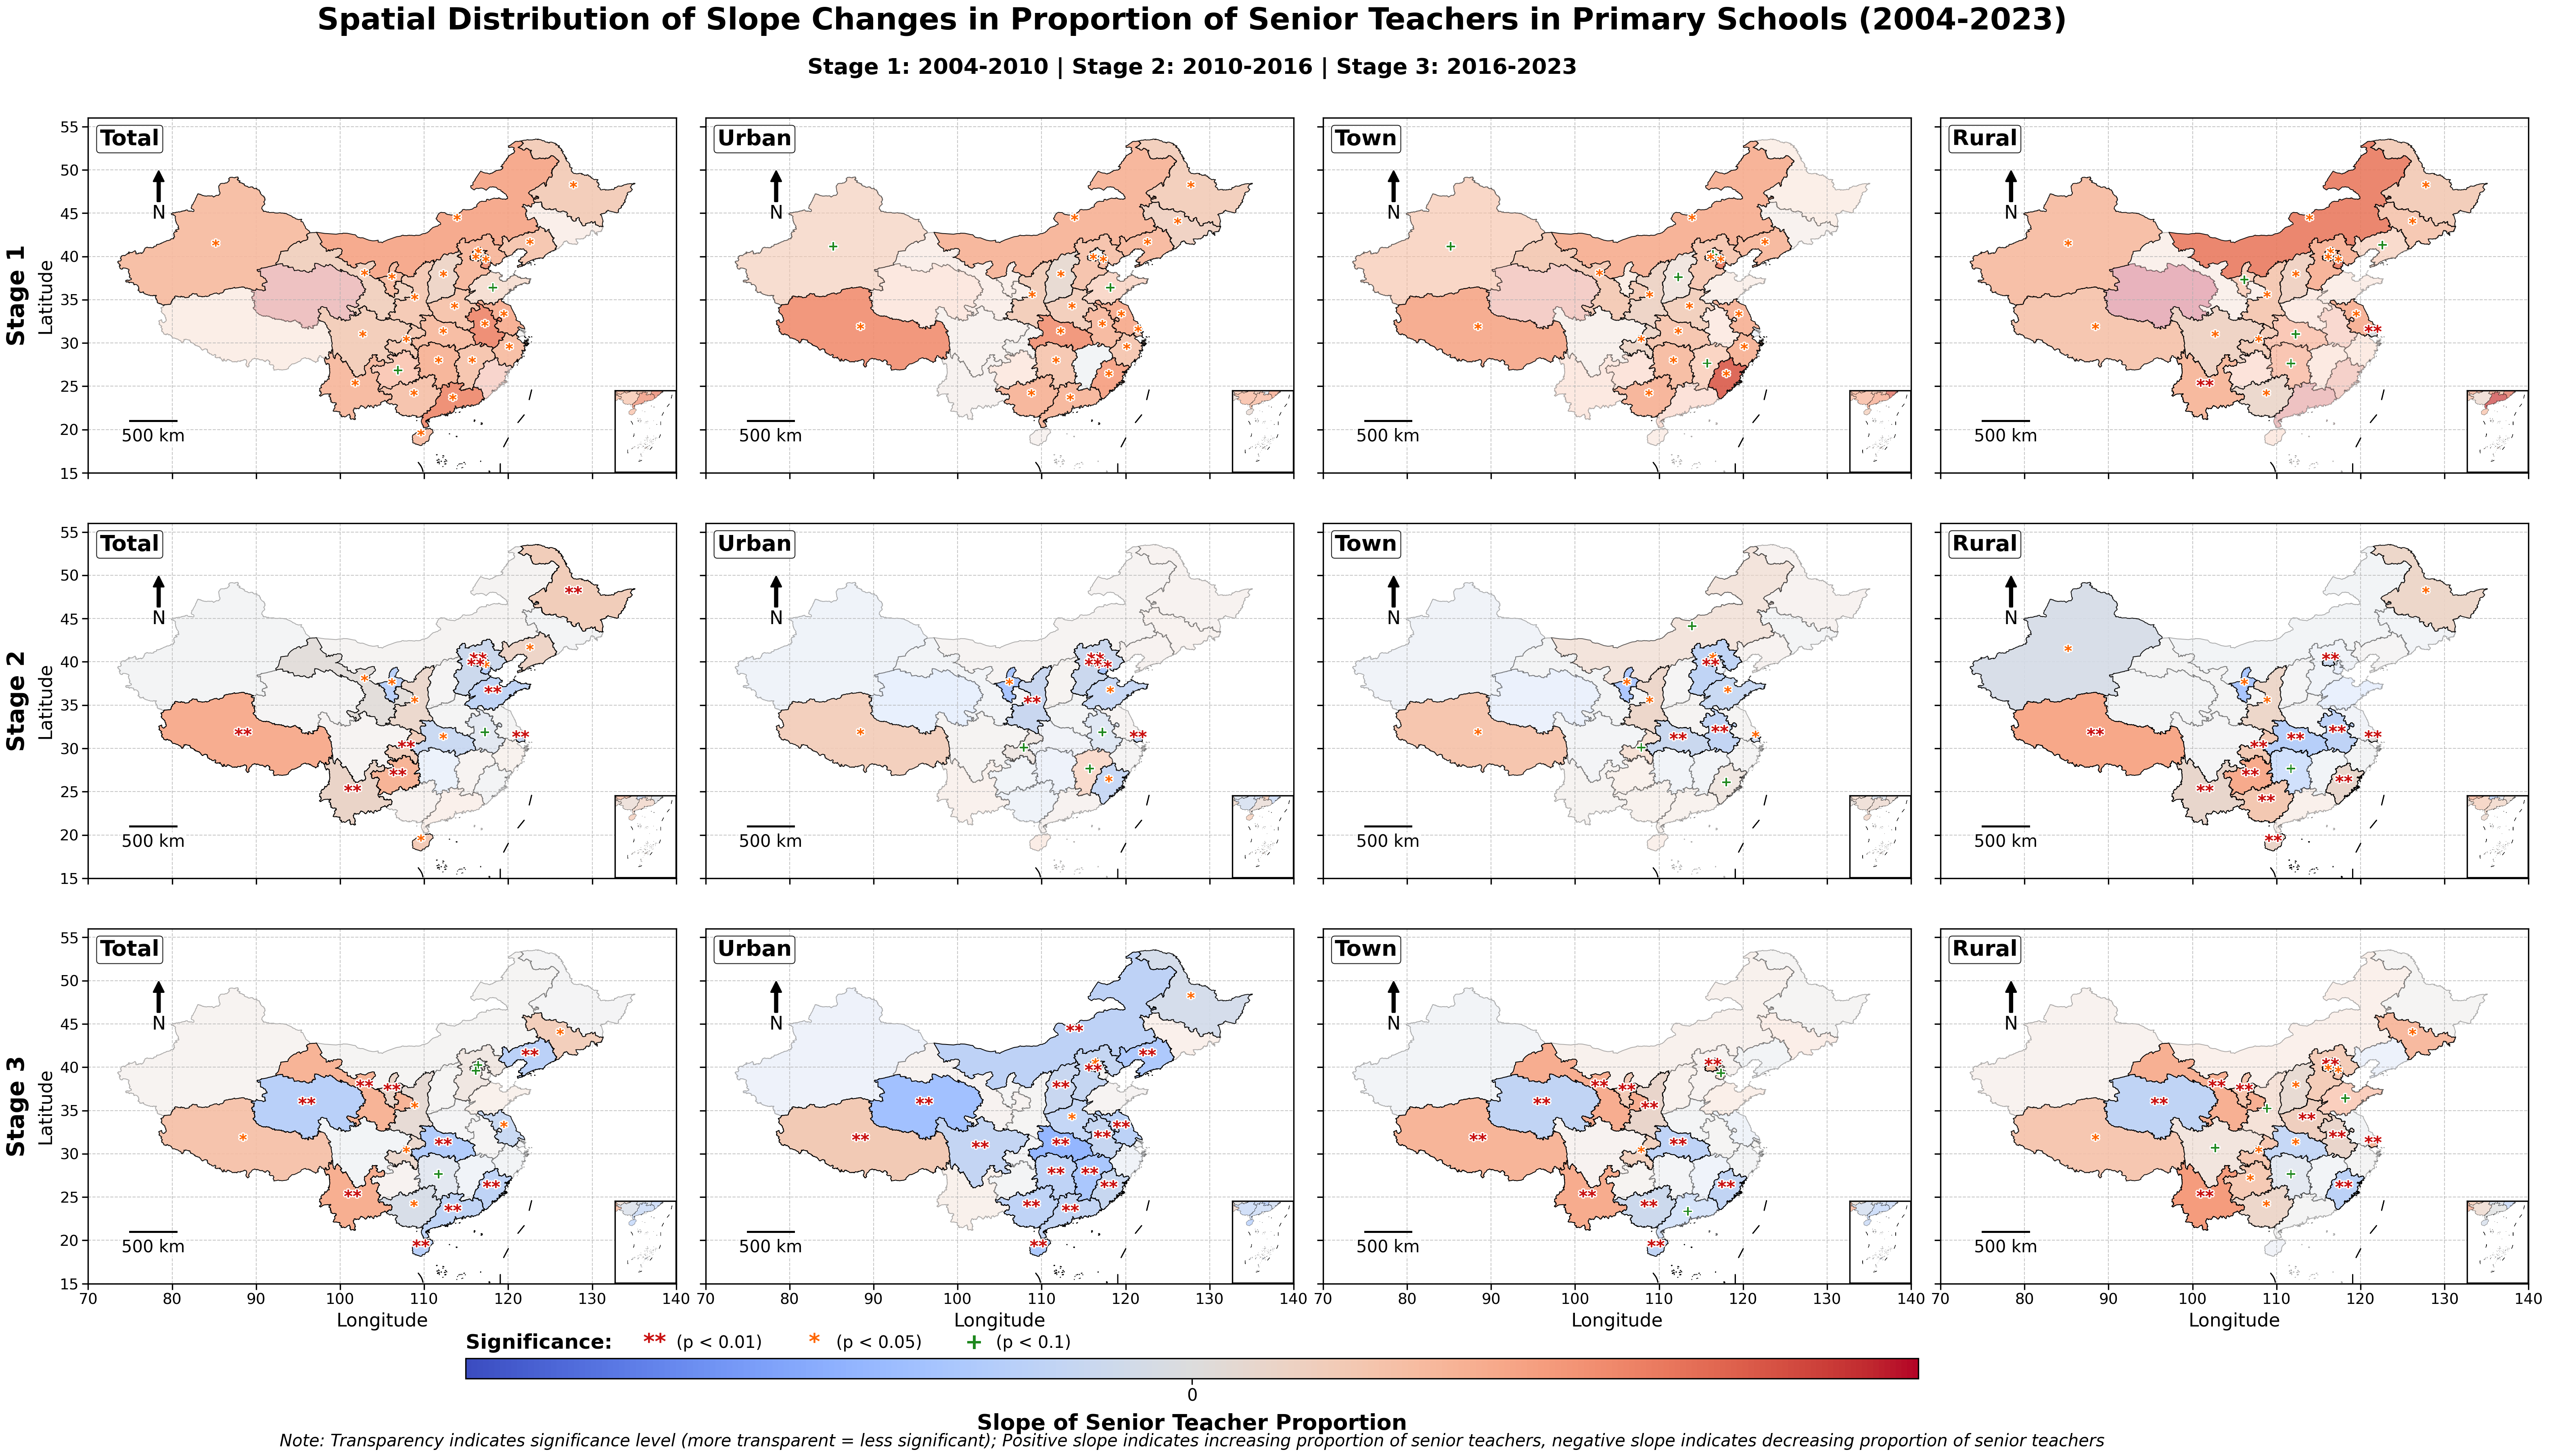


**Figure S11.** The Theil–Sen trend classification for PBAT across three sub-periods (2004–2010, 2010–2016, 2016–2023), stratified by total, urban, town, and rural area.

**
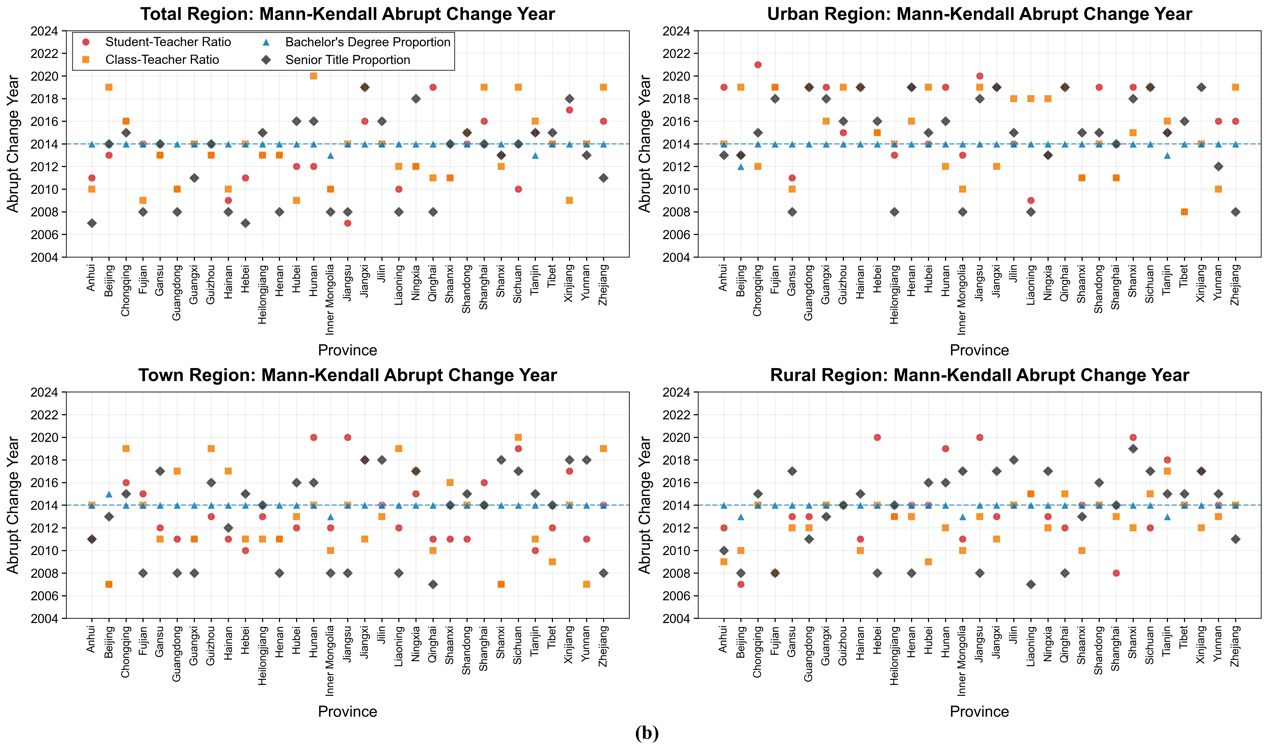
**

**Figure S12.** The Mann–Kendall abrupt change test results for all four teacher-allocation indicators (STR, CTR, PBAT, and PMSTT) across each province of China, stratified by total, urban, town, and rural area.

## S5. Theil Index and Inequality Decomposition of Primary School Teacher Resources in China

**Table S3.** Theil index and its decomposition results for the four teacher-allocation indicators (STR, CTR, PBAT, and PMSTT) across China’s primary education at four time points (2004, 2010, 2016, 2022), stratified by urban, town, and rural area.

| **Year** | **Urban Theil index** | **Town Theil index** | **Rural Theil index** |
| --- | --- | --- | --- |
| **Student-teacher ratio** | | | |
| 2004 | 0.0131(38.6) | 0.0148(36.1) | 0.0401(61.3) |
| 2010 | 0.0130(43.1) | 0.0104(37.5) | 0.0304(52.6) |
| 2016 | 0.0071(53.0) | 0.0124(51.9) | 0.0270(53.4) |
| 2022 | 0.0041(41.0) | 0.0137(69.0) | 0.0375(55.8) |
| **Class-teacher ratio** | | | |
| 2004 | 0.0055(48.6) | 0.0072(38.0) | 0.0256(49.5) |
| 2010 | 0.0035(40.2) | 0.0030(20.0) | 0.0140(39.0) |
| 2016 | 0.0026(43.5) | 0.0051(45.3) | 0.0104(37.1) |
| 2022 | 0.0017(13.7) | 0.0053(54.7) | 0.0130(49.4) |
| **Proportion of bachelor-and-above teachers** | | | |
| 2004 | 0.1070(30.8) | 0.2235(35.9) | 0.3475(36.6) |
| 2010 | 0.0288(25.1) | 0.1108(49.7) | 0.1604(53.9) |
| 2016 | 0.0122(48.2) | 0.0349(51.5) | 0.0552(45.8) |
| 2022 | 0.0022(26.0) | 0.0104(32.0) | 0.0190(31.9) |
| **Proportion of mid-to-senior title teachers** | | | |
| 2004 | 0.0191(38.3) | 0.0285(40.4) | 0.0766(48.9) |
| 2010 | 0.0141(34.5) | 0.0214(21.9) | 0.0531(35.3) |
| 2016 | 0.0140(52.0) | 0.0219(28.0) | 0.0288(33.5) |
| 2022 | 0.0174(52.2) | 0.0152(37.8) | 0.0192(29.0) |

**Table S4.** Theil index and its decomposition results for the four teacher-allocation indicators (STR, CTR, PBAT, and PMSTT) across China’s primary education at four time points (2004, 2010, 2016, 2022), decomposed by the four geographic regions (e.g., Eastern, Central, Western, and Northeastern).

| **Year** | **East Theil index** | **Central Theil index** | **Northeast Theil index** | **West Theil index** |
| --- | --- | --- | --- | --- |
| **Student-teacher ratio** | | | | |
| 2004 | 0.0232 | 0.0134 | 0.0087 | 0.0099 |
| 2010 | 0.0097 | 0.0174 | 0.0056 | 0.0072 |
| 2016 | 0.0043 | 0.0139 | 0.0040 | 0.0060 |
| 2022 | 0.0025 | 0.0073 | 0.0067 | 0.0038 |
| **Class-teacher ratio** | | | | |
| 2004 | 0.0105 | 0.0056 | 0.0013 | 0.0094 |
| 2010 | 0.0058 | 0.0086 | 0.0008 | 0.0065 |
| 2016 | 0.0040 | 0.0056 | 0.0010 | 0.0034 |
| 2022 | 0.0029 | 0.0053 | 0.0013 | 0.0024 |
| **Proportion of bachelor-and-above teachers** | | | | |
| 2004 | 0.2640 | 0.0512 | 0.1191 | 0.1545 |
| 2010 | 0.1556 | 0.0393 | 0.0159 | 0.0394 |
| 2016 | 0.0522 | 0.0095 | 0.0050 | 0.0129 |
| 2022 | 0.0122 | 0.0021 | 0.0026 | 0.0054 |
| **Proportion of mid-to-senior title teachers** | | | | |
| 2004 | 0.0229 | 0.0238 | 0.0114 | 0.0542 |
| 2010 | 0.0118 | 0.0289 | 0.0104 | 0.0326 |
| 2016 | 0.0083 | 0.0241 | 0.0098 | 0.0149 |
| 2022 | 0.0084 | 0.0103 | 0.0020 | 0.0139 |

## S6. Lorenz Curves of Primary Teacher Allocation by Years

**Figure S13.** Lorenz curves for the four teacher-allocation indicators (STR, CTR, PBAT, and PMSTT) in China’s primary education across six time points (2004, 2008, 2012, 2016, 2020, 2023).


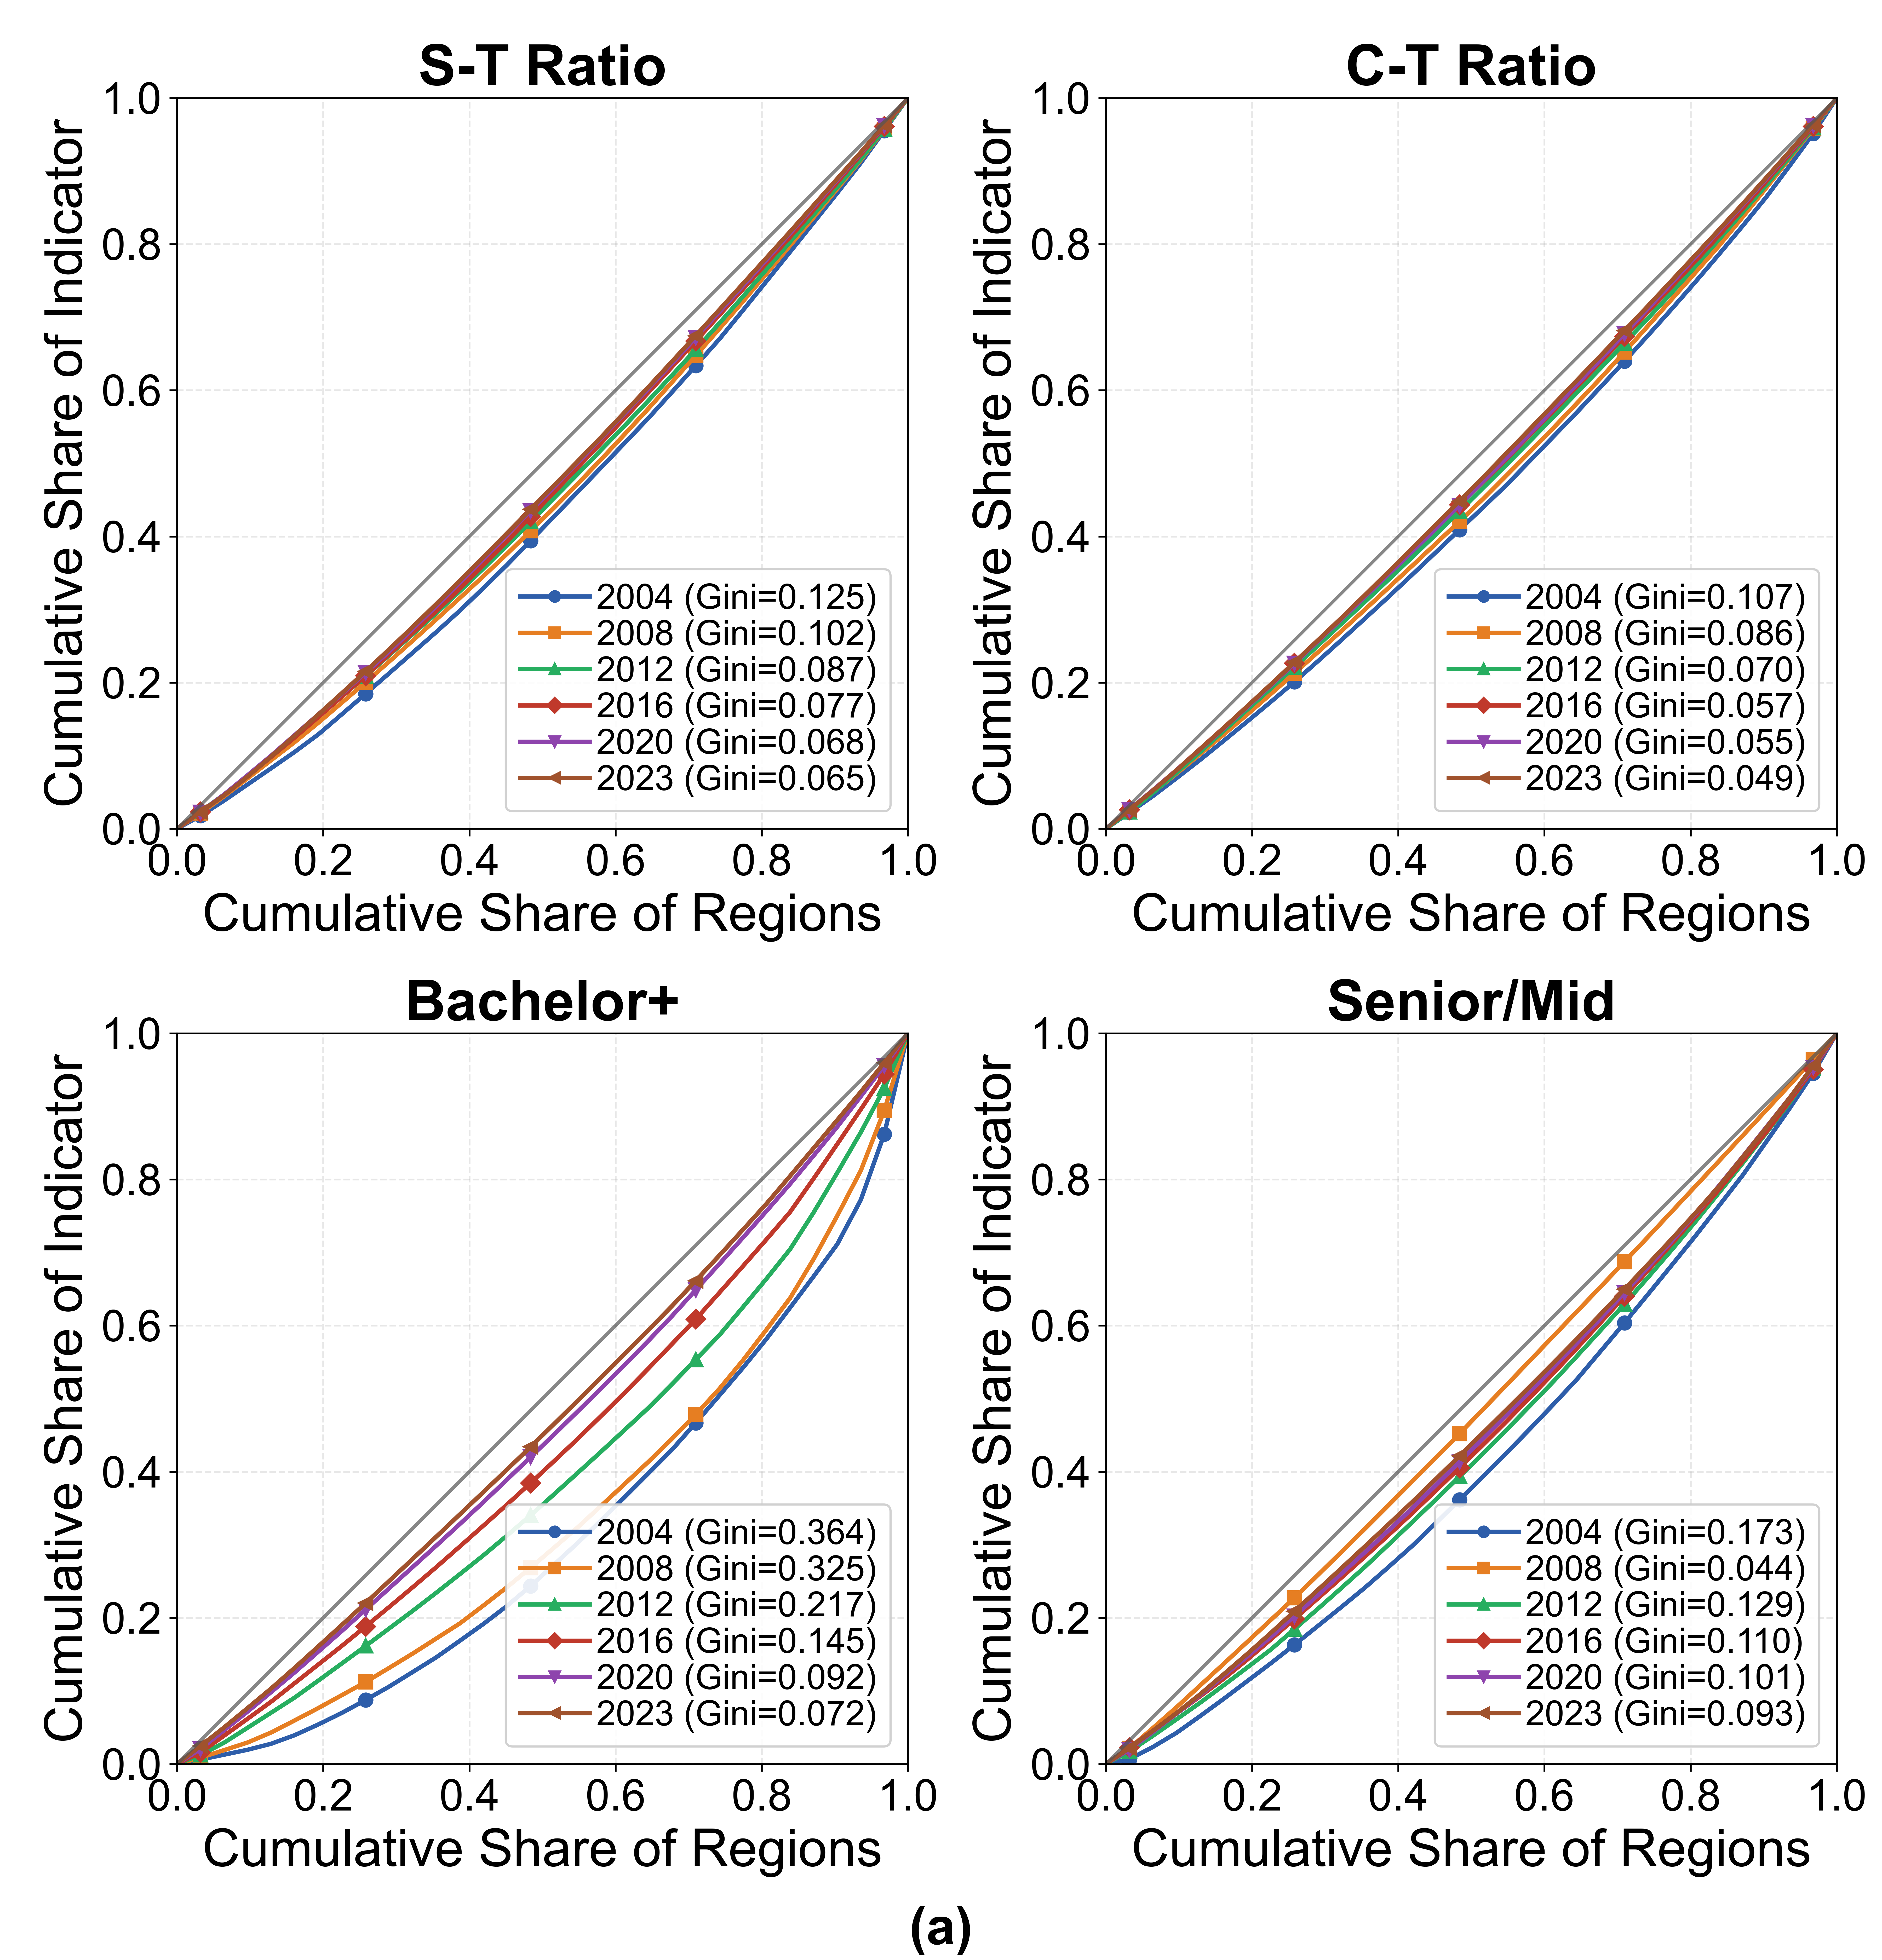

Supplement: Supplementary file 1 [file 27d5ea31dba1f2268b3813b7.docx]
